# Supplementary material for: 4-Alkylated Silver–N-Heterocyclic Carbene (NHC) Complexes with Cytotoxic Effects in Leukemia Cells
Source: PubMed Central journal article supplement — ChemMedChem. 2015 Aug 6;10(9):1522–7. doi: 10.1002/cmdc.201500234 (PMC4576820; doi:10.1002/cmdc.201500234), 2015-08-06

## Supporting Information

### **4-Alkylated Silver–N-Heterocyclic Carbene (NHC) Complexes with Cytotoxic Effects in Leukemia Cells**

Alexander H. Sandtorv,<sup>[a]</sup> Calum Leitch,<sup>[b]</sup> Siv Lise Bedringaas,<sup>[b]</sup> Bjørn Tore Gjertsen,<sup>[b, c]</sup> and  
Hans-René Bjørsvik\*<sup>[a]</sup>

cmdc\_201500234\_sm\_miscellaneous\_information.pdf

## Table of Contents

|                                                                                                              |    |
|--------------------------------------------------------------------------------------------------------------|----|
| Synthesis of additional derivatives. ....                                                                    | 2  |
| <sup>1</sup> H-NMR of <i>N</i> -phenyl-4-methylimidazole (3) .....                                           | 3  |
| <sup>13</sup> C-NMR of <i>N</i> -phenyl-4-methylimidazole (3) .....                                          | 4  |
| COSY 2D-NMR spectrum of <i>N</i> -phenyl-4-methylimidazole (3) .....                                         | 5  |
| <sup>1</sup> H-NMR spectrum of <i>N</i> -1-phenyl- <i>N</i> -3-methyl-4-methylimidazolium iodide (4) .....   | 6  |
| <sup>13</sup> C-NMR spectrum of <i>N</i> -1-phenyl- <i>N</i> -3-methyl-4-methylimidazolium iodide (4) .....  | 7  |
| HRMS spectrum of <i>N</i> -1-phenyl- <i>N</i> -3-methyl-4-methylimidazolium iodide (4).....                  | 8  |
| 2D-COSY NMR spectrum of <i>N</i> -1-phenyl- <i>N</i> -3-methyl-4-methylimidazolium iodide (4). 9             |    |
| <sup>1</sup> H-NMR spectrum of NHC-1 .....                                                                   | 10 |
| <sup>13</sup> C-NMR spectrum of NHC-1 .....                                                                  | 11 |
| HRMS spectrum of NHC-1 .....                                                                                 | 12 |
| <sup>1</sup> H-NMR spectrum of <i>N</i> -tosyl-4-heptylimidazole (11) .....                                  | 13 |
| <sup>13</sup> C-NMR spectrum of <i>N</i> -tosyl-4-heptylimidazole (11).....                                  | 14 |
| HRMS spectrum of <i>N</i> -tosyl-4-heptylimidazole (11) .....                                                | 15 |
| <sup>1</sup> H-NMR spectrum of 4-(5)-heptyl-1 <i>H</i> -imidazole (12).....                                  | 16 |
| <sup>13</sup> C-NMR spectrum of 4-(5)-heptyl-1 <i>H</i> -imidazole (12) .....                                | 17 |
| HRMS spectrum of 4-(5)-heptyl-1 <i>H</i> -imidazole (12).....                                                | 18 |
| <sup>1</sup> H-NMR spectrum of <i>N</i> -phenyl-4-heptylimidazole (13).....                                  | 19 |
| <sup>13</sup> C-NMR spectrum of <i>N</i> -phenyl-4-heptylimidazole (13).....                                 | 20 |
| HRMS spectrum of <i>N</i> -phenyl-4-heptylimidazole (13) .....                                               | 21 |
| COSY 2D-NMR spectrum of <i>N</i> -phenyl-4-heptylimidazole (13).....                                         | 22 |
| <sup>1</sup> H-NMR spectrum of <i>N</i> -1-phenyl- <i>N</i> -3-methyl-4-heptylimidazolium iodide (14) .....  | 23 |
| <sup>13</sup> C-NMR spectrum of <i>N</i> -1-phenyl- <i>N</i> -3-methyl-4-heptylimidazolium iodide (14) ..... | 24 |
| <sup>1</sup> H-NMR spectrum of NHC-2 .....                                                                   | 25 |
| <sup>13</sup> C-NMR spectrum of NHC-2 .....                                                                  | 26 |
| HRMS spectrum of NHC-2 .....                                                                                 | 27 |
| 2D COSY-NMR spectrum NHC-2 .....                                                                             | 28 |
| <sup>1</sup> H-NMR spectrum of <i>N</i> -tosyl-4-(2-phenylethyl)imidazole (15) .....                         | 29 |
| <sup>13</sup> C-NMR spectrum of <i>N</i> -tosyl-4-(2-phenylethyl)imidazole (15) .....                        | 30 |
| HRMS spectrum of <i>N</i> -tosyl-4-(2-phenylethyl)imidazole (15) .....                                       | 31 |
| <sup>1</sup> H-NMR spectrum of 4-(5)-(2-phenylethyl)-1 <i>H</i> -imidazole (16).....                         | 32 |
| <sup>13</sup> C-NMR spectrum of 4-(5)-(2-phenylethyl)-1 <i>H</i> -imidazole (16).....                        | 33 |
| HRMS spectrum of 4-(5)-(2-phenylethyl)-1 <i>H</i> -imidazole (16) .....                                      | 34 |
| <sup>1</sup> H-NMR spectrum of <i>N</i> -tosyl-4-decylimidazole (17) .....                                   | 35 |
| <sup>13</sup> C-NMR spectrum of <i>N</i> -tosyl-4-decylimidazole (17) .....                                  | 36 |
| HRMS spectrum of <i>N</i> -tosyl-4-decylimidazole (17).....                                                  | 37 |
| COSY-NMR spectrum of <i>N</i> -tosyl-4-decylimidazole (17).....                                              | 38 |
| HRMS spectrum of 4-(5)-decyl-1 <i>H</i> -imidazole (18) .....                                                | 41 |

## Synthesis of additional derivatives.

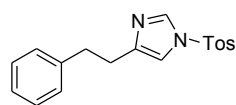

**N-tosyl-4-(2-phenylethyl)imidazole 15** [NEW]. Isolated as pale crystals in a yield of 98%.  $R_f = 0.58$  [EtOAc: Hx (4:6)].  $^1\text{H-NMR}$  ( $\text{CDCl}_3$ ):  $\delta$  7.94 (s, 1H), 7.77 (d, 2H,  $J = 8.5$  Hz), 7.34 (d, 2H,  $J = 8.3$  Hz), 7.19 (m, 3H), 7.11 (d, 2H,  $J = 7.5$  Hz), 6.89 (s, 1H), 2.91 (m, 2H), 2.82 (m, 2H), 2.45 (s, 3H).  $^{13}\text{C-NMR}$  ( $\text{CDCl}_3$ ):  $\delta$  146.1, 144.8, 141.3, 136.3, 135.3, 130.5, 128.5, 128.4, 127.4, 126.1, 113.4, 35.0, 30.2, 21.9. HRMS (DART):  $m/z$   $[\text{MH}]^+$  calcd. for  $\text{C}_{18}\text{H}_{19}\text{N}_2\text{O}_2\text{S}$ : 327.11617, found 327.11499

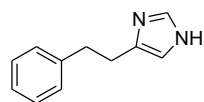

**4-(5)-(2-phenylethyl)-1H-imidazole 16** [NEW]. Isolated in high purity (100%, based on GC) as a tan oil in a yield of 86%.  $^1\text{H-NMR}$  ( $\text{CDCl}_3$ ):  $\delta$  9.90 (1H, s, br), 7.55 (1H, s), 7.25 (2H, m), 7.14 (m, 3H), 6.76 (s, 1H), 2.93 (s, 4H).  $^{13}\text{C-NMR}$  ( $\text{CDCl}_3$ ):  $\delta$  141.7, 136.7, 134.5, 128.7, 126.2, 117.7, 36.1, 29.2. HRMS (DART):  $m/z$   $[\text{MH}]^+$  calcd. for  $\text{C}_{11}\text{H}_{13}\text{N}_2$ : 173.10787, found: 173.10765.

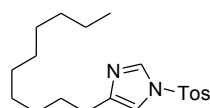

**N-tosyl-4-decylimidazole 17** [NEW]. Isolated as tan crystals in the yield of 98%.  $^1\text{H-NMR}$  ( $\text{CDCl}_3$ ):  $\delta$  7.91 (s, 1H), 7.80 (d, 2H,  $J = 8.5$  Hz), 6.96 (s, 1H), 2.49 (t, 2H,  $J = 7.7$  Hz), 2.43 (s, 3H), 1.58 (m, 2H), 1.25 (m, 16H), 0.87 (t, 3H,  $J = 7.0$  Hz).  $^{13}\text{C-NMR}$  ( $\text{CDCl}_3$ ):  $\delta$  146.1, 136.2, 135.4, 130.5, 127.4, 127.4, 112.8, 32.0, 29.71, 29.66, 29.5, 29.44, 29.37, 28.7, 28.3, 22.8, 21.8, 14.3. HRMS (DART):  $m/z$   $[\text{MH}]^+$  calcd. for  $\text{C}_{20}\text{H}_{31}\text{N}_2\text{O}_2\text{S}$ : 363.21062, found 363.21053.

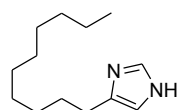

**4-(5)-decyl-1H-imidazole 18** [NEW]. Isolated as a yellow oil that was prone to crystallization in a yield of 58%.  $^1\text{H-NMR}$  ( $\text{CDCl}_3$ ):  $\delta$  9.00 (1H, br, s), 7.00 (1H, s), 3.63 (2H, s, br), 1.49 (1H, m), 1.67 (2H, m), 1.26 (15H, m), 0.86 (3H, t).  $^{13}\text{C-NMR}$  ( $\text{CDCl}_3$ ):  $\delta$  134.4, 133.1, 114.5, 31.9, 29.57, 29.53, 29.3, 29.2, 29.0, 28.4, 24.6, 22.7, 14.1. HRMS (ESI):  $m/z$   $[\text{MH}]^+$  calcd. for  $\text{C}_{13}\text{H}_{25}\text{N}_2$ : 209.20177, found: 209.20123.

# <sup>1</sup>H-NMR of *N*-phenyl-4-methylimidazole (3)

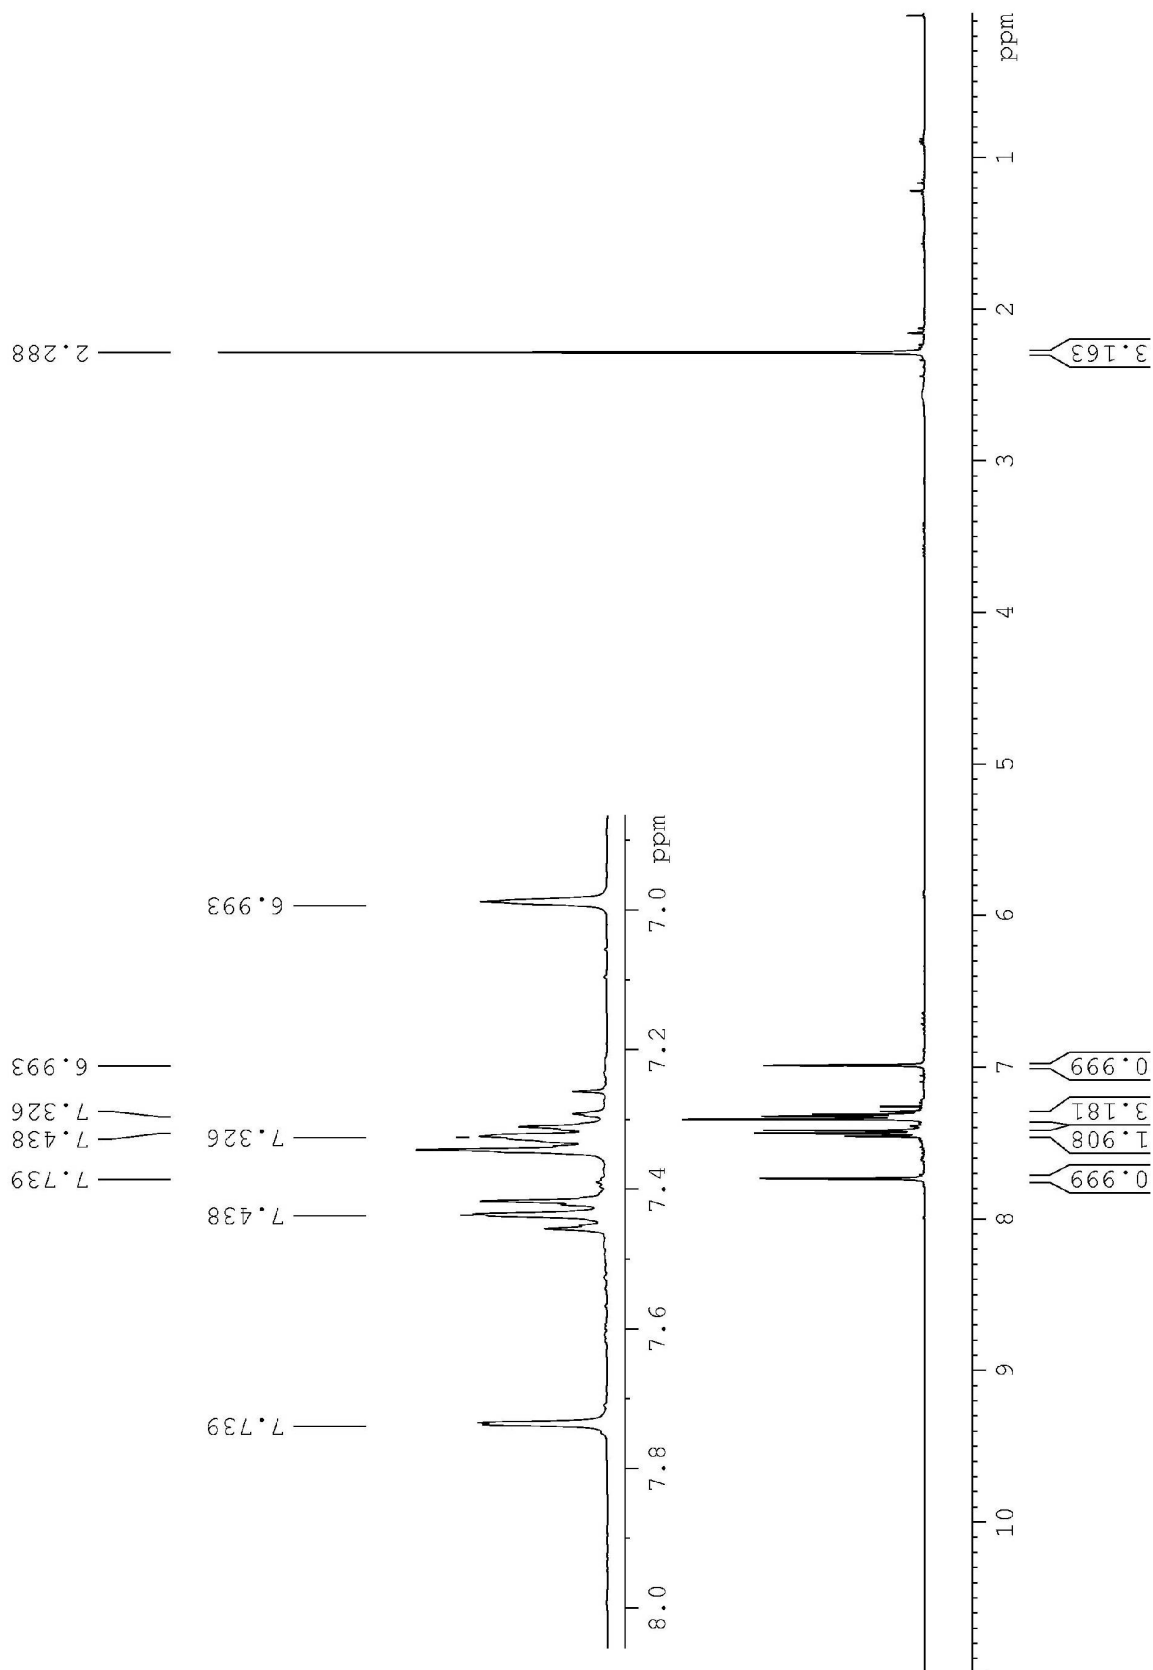

<sup>13</sup>C-NMR of *N*-phenyl-4-methylimidazole (3)

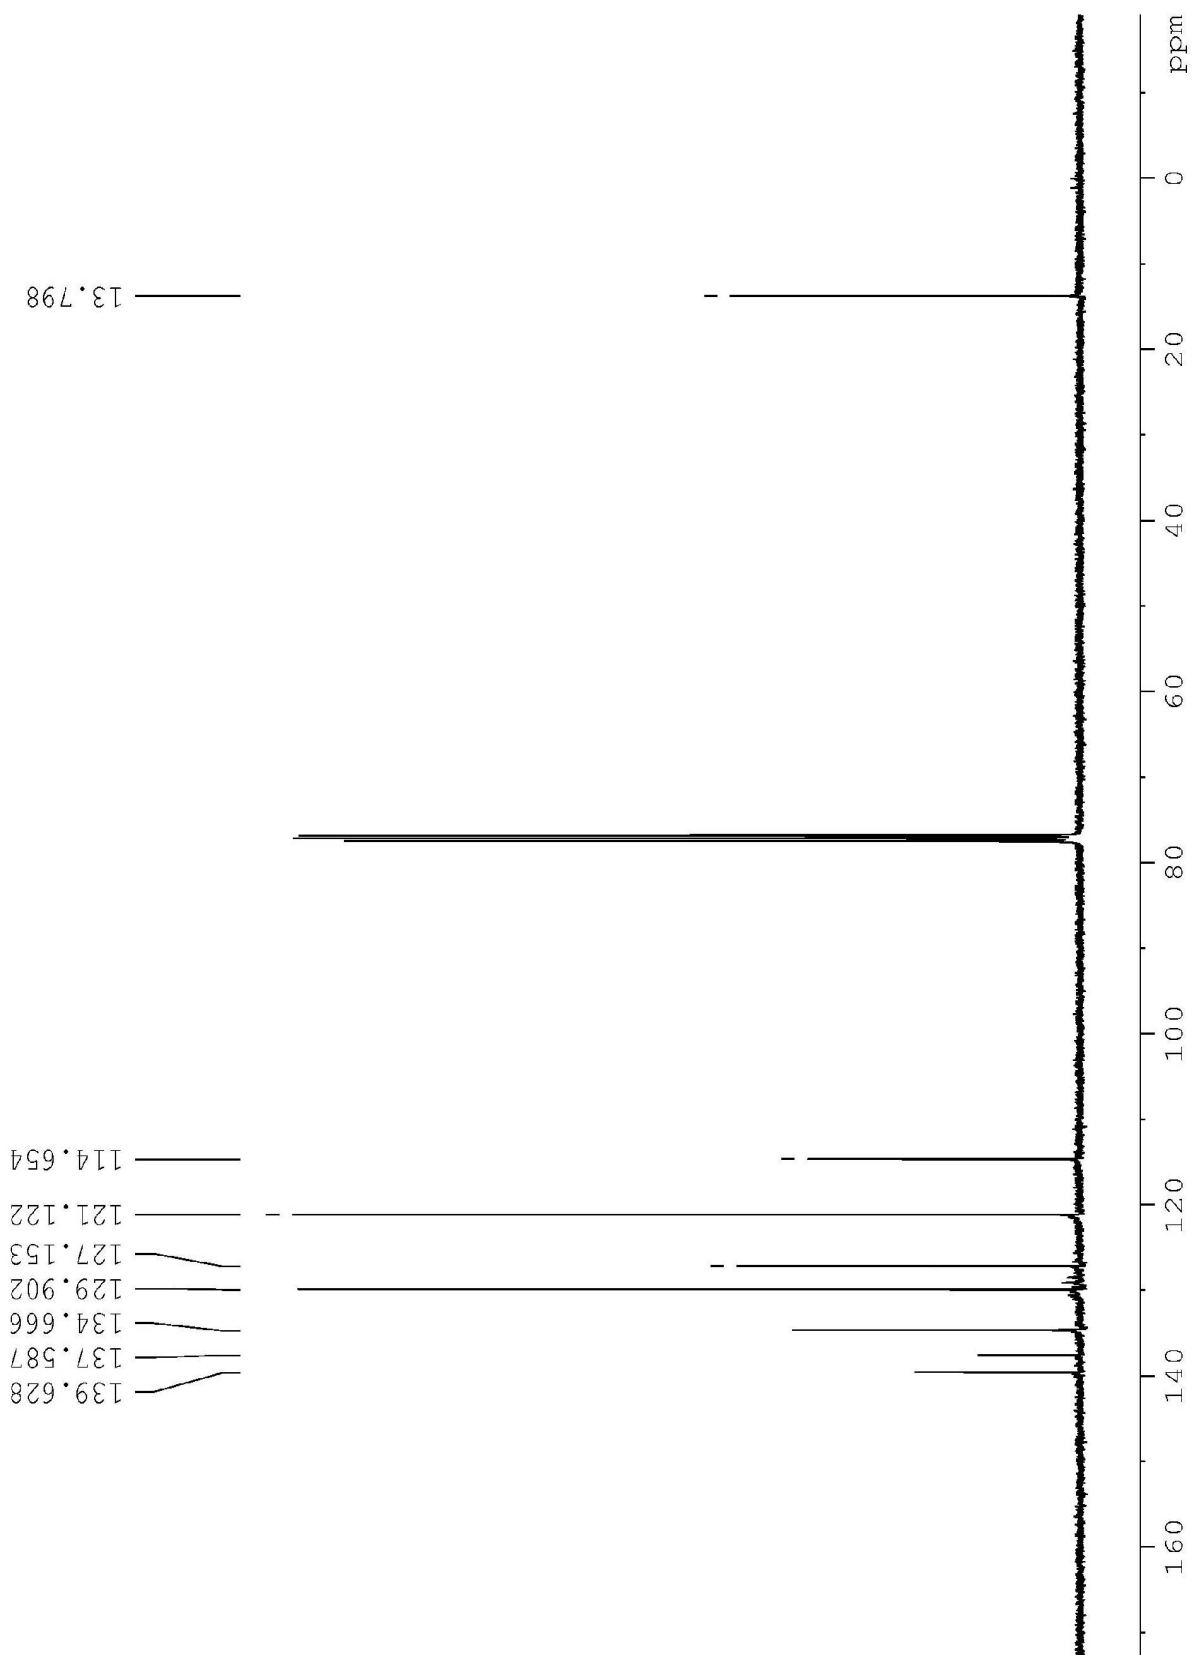

COSY 2D-NMR spectrum of N-phenyl-4-methylimidazole (3)

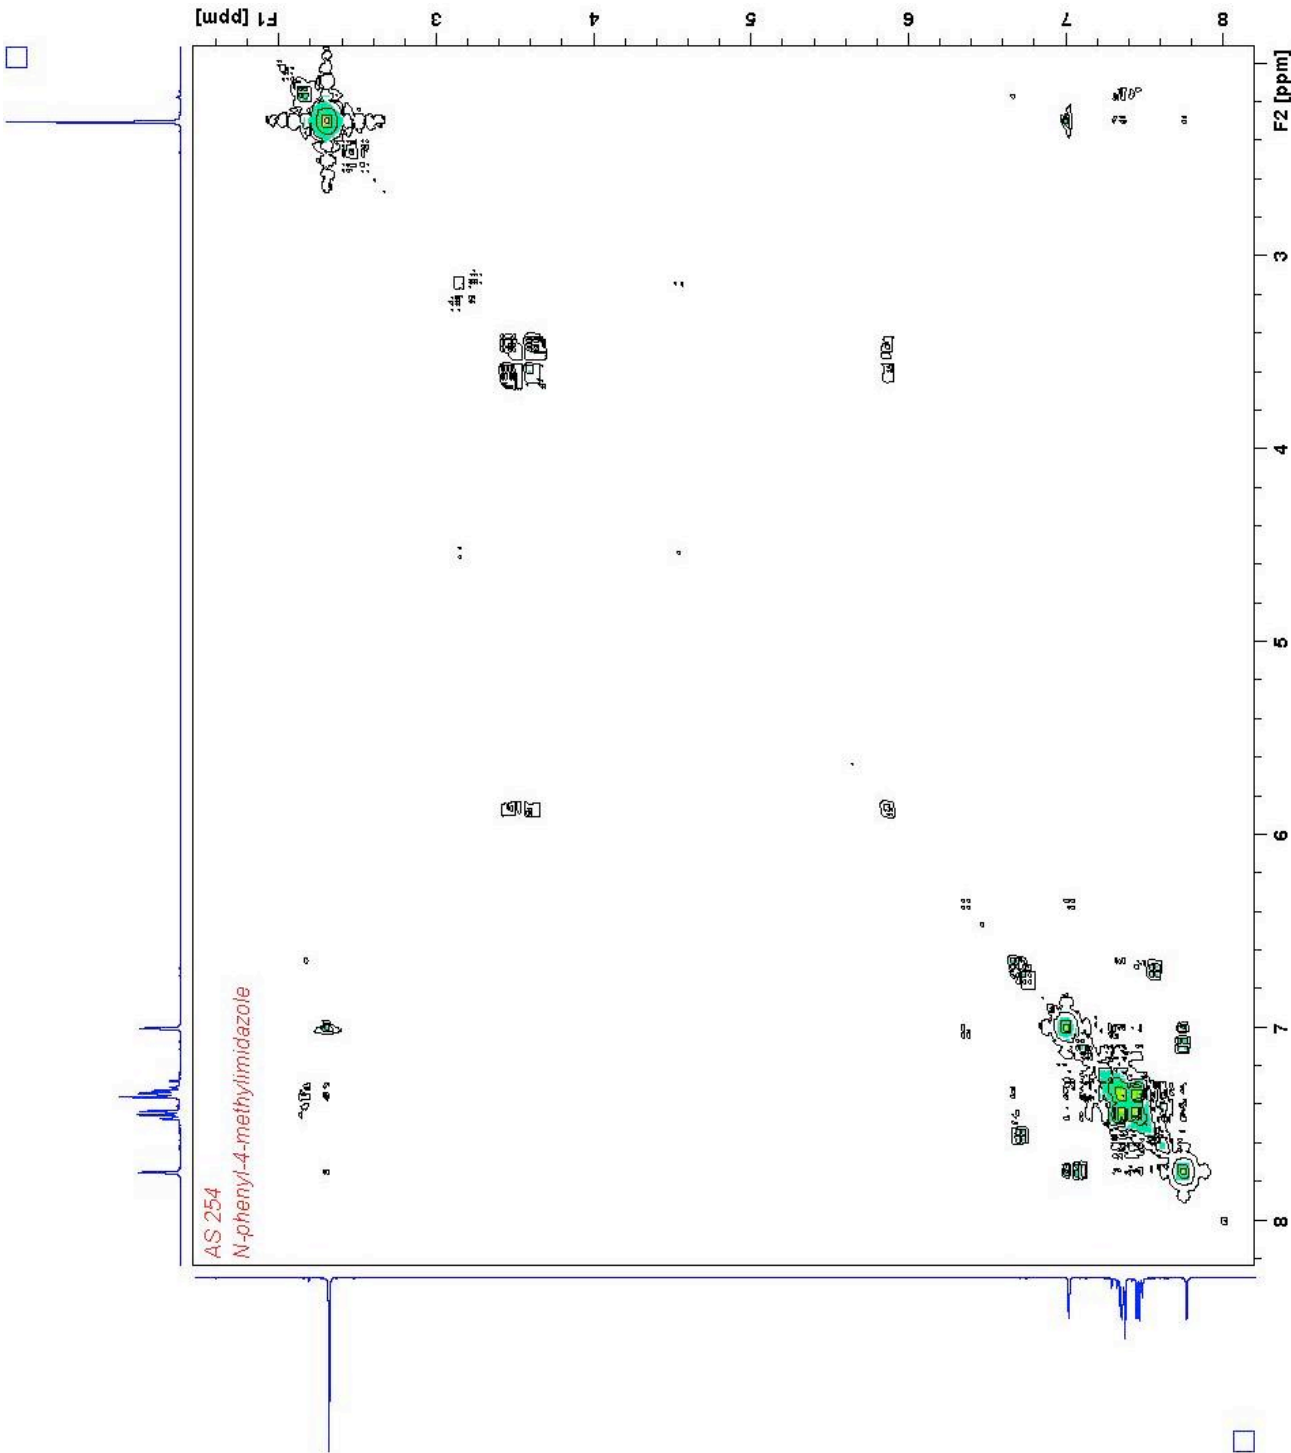

**<sup>1</sup>H-NMR spectrum of *N*-1-phenyl-*N*-3-methyl-4-methylimidazolium iodide (4)**

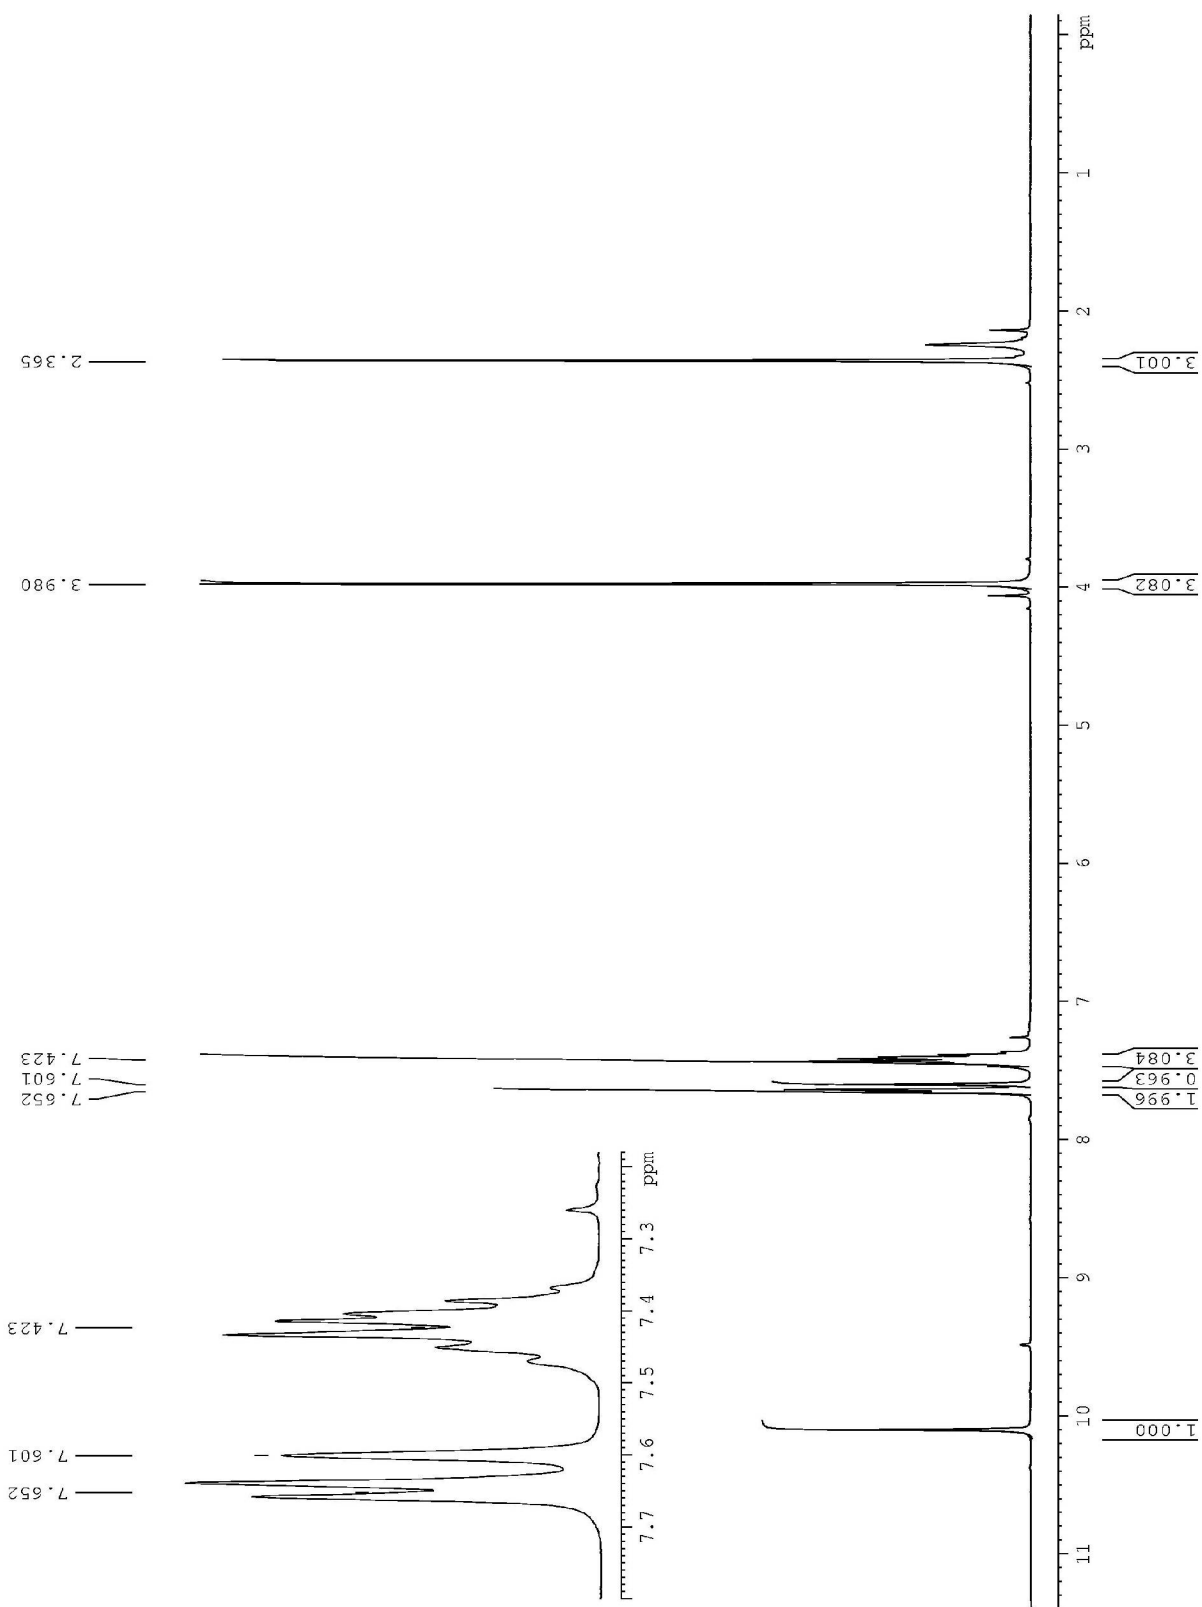

**<sup>13</sup>C-NMR spectrum of *N*-1-phenyl-*N*-3-methyl-4-methylimidazolium iodide (4)**

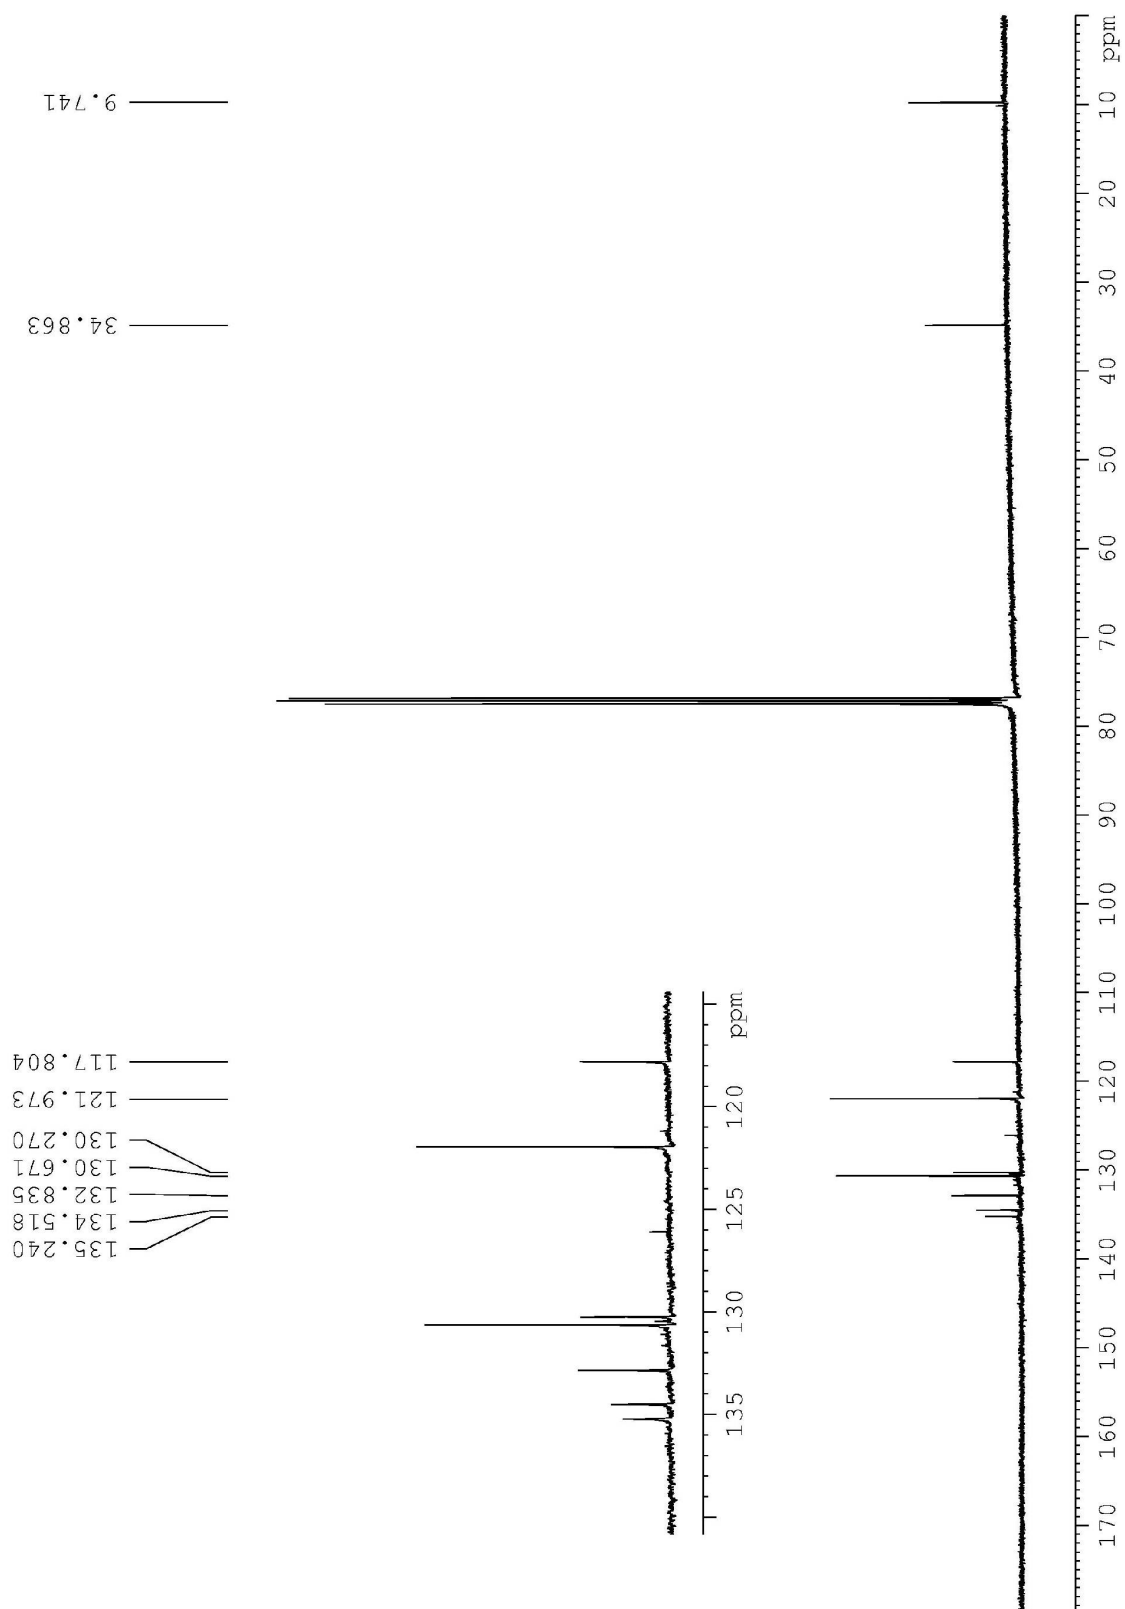





2D-COSY NMR spectrum of *N*-1-phenyl-*N*-3-methyl-4-methylimidazolium iodide  
(4)

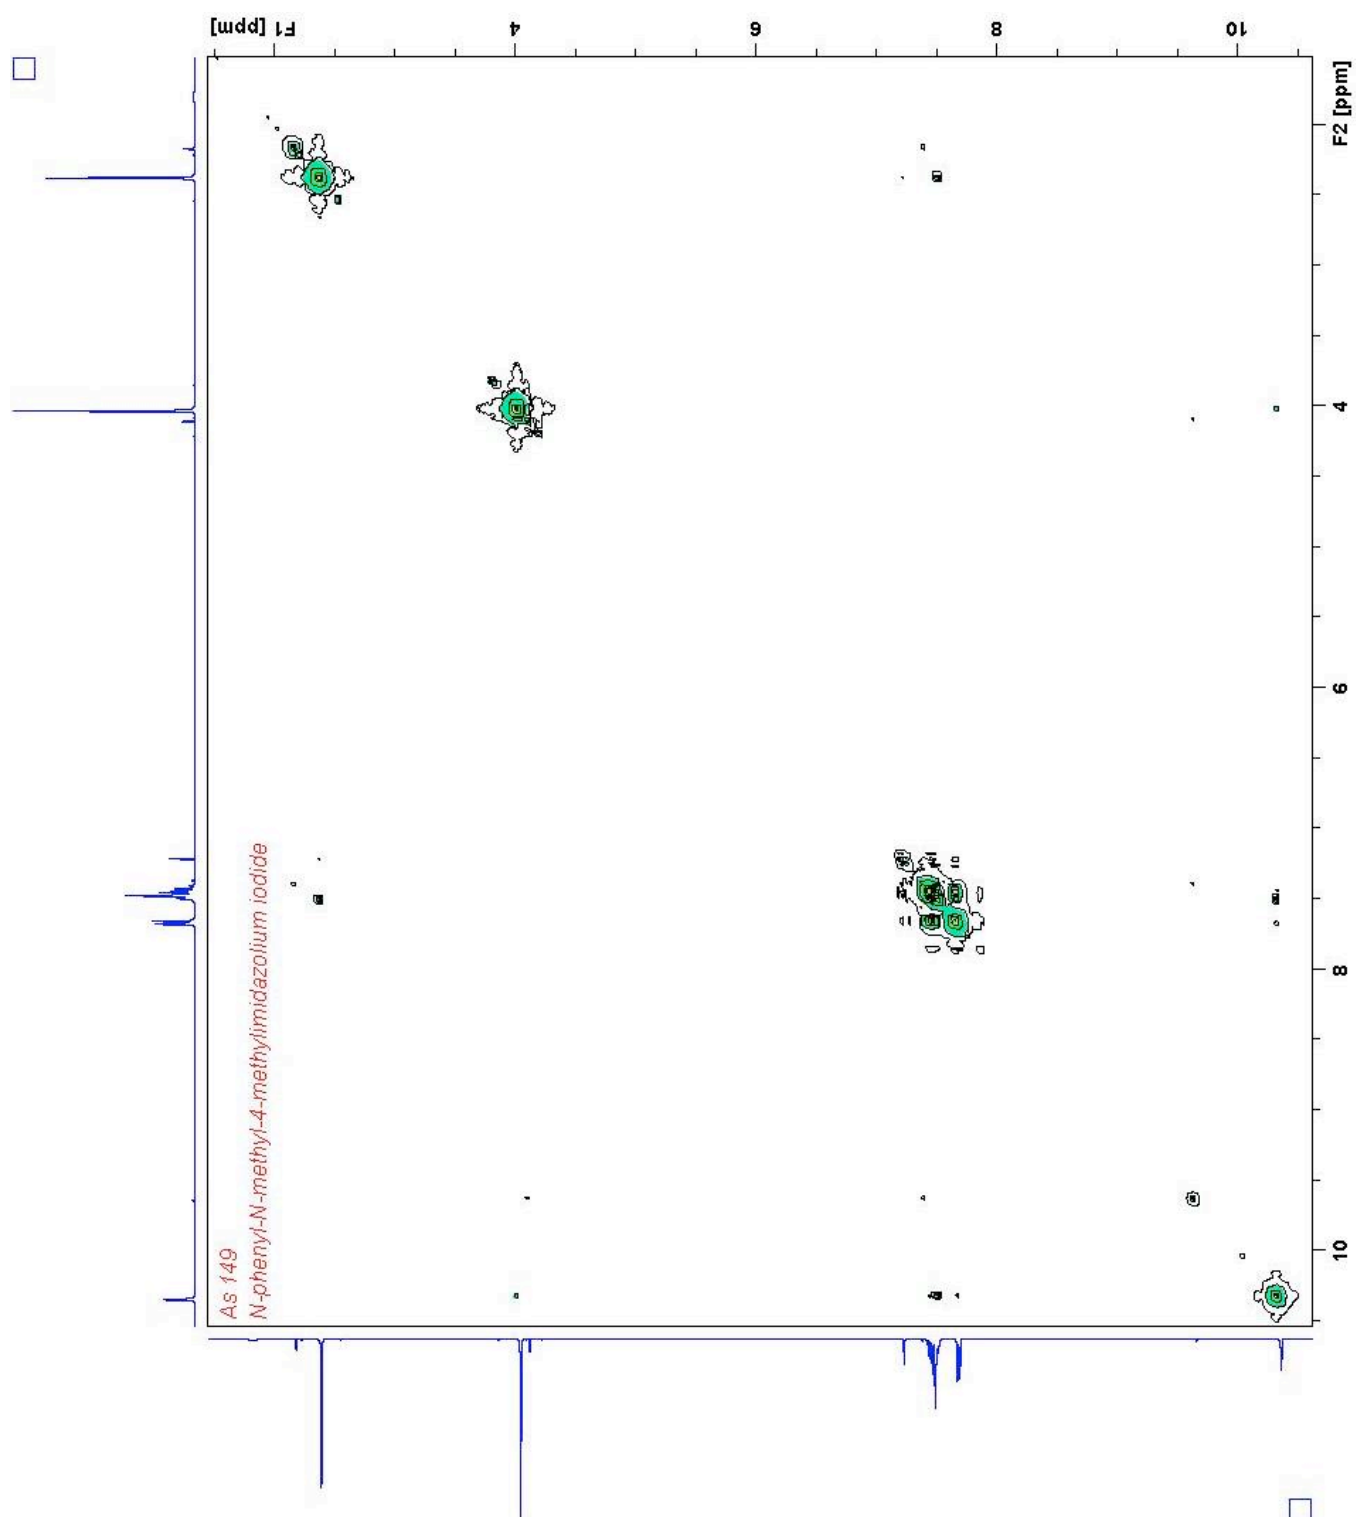

# <sup>1</sup>H-NMR spectrum of NHC-1

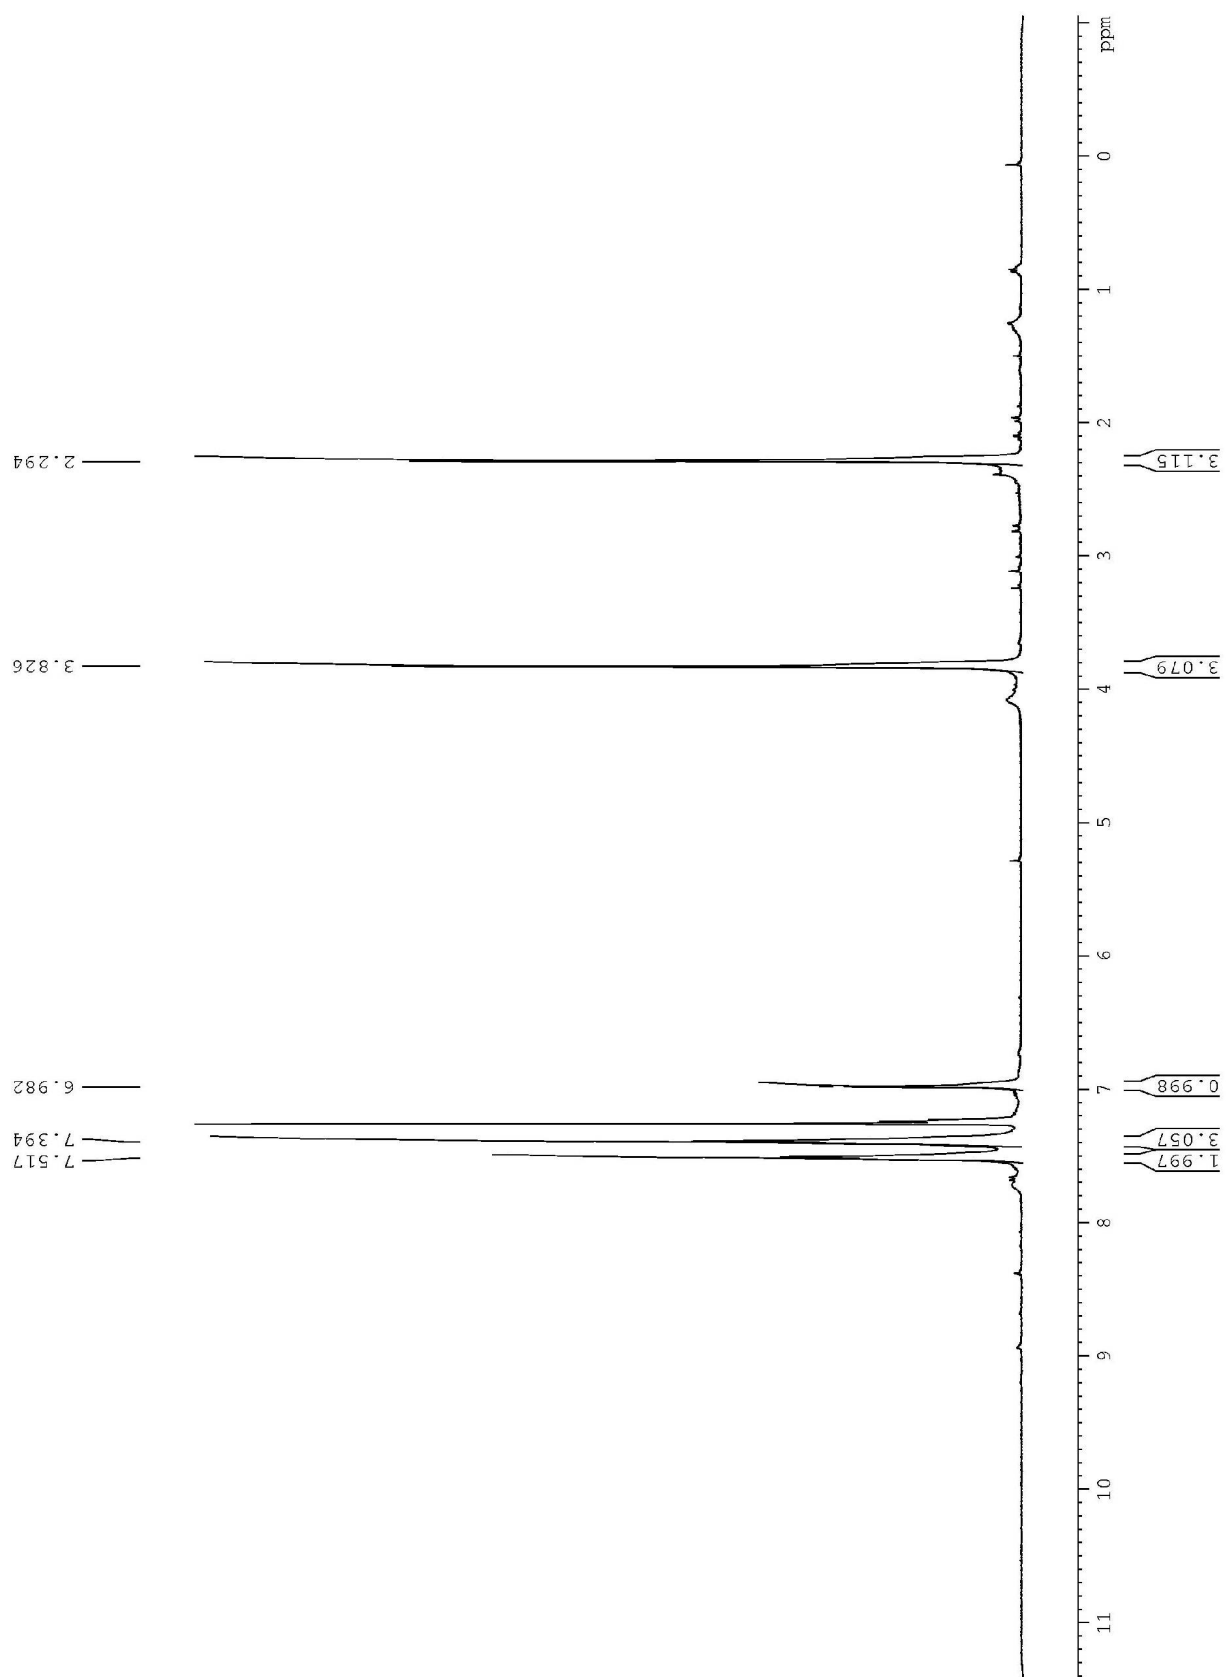

# <sup>13</sup>C-NMR spectrum of NHC-1

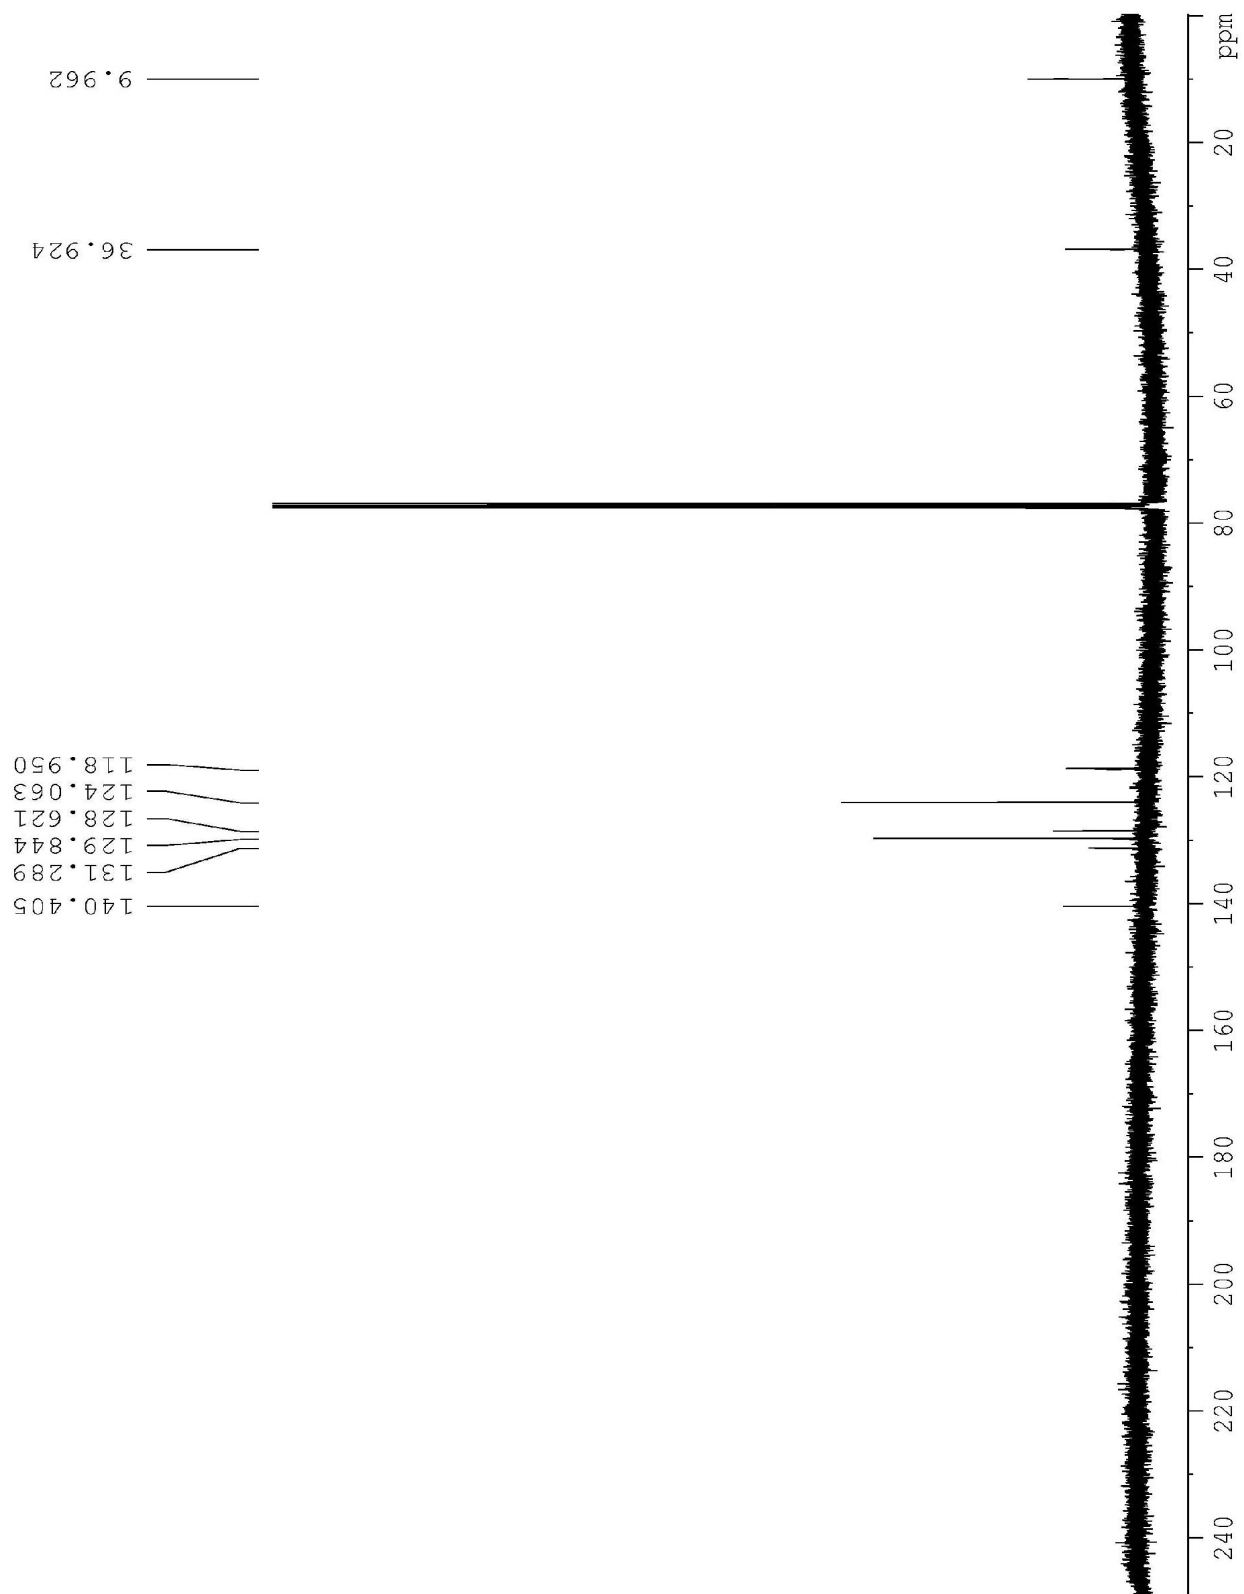

# HRMS spectrum of NHC-1

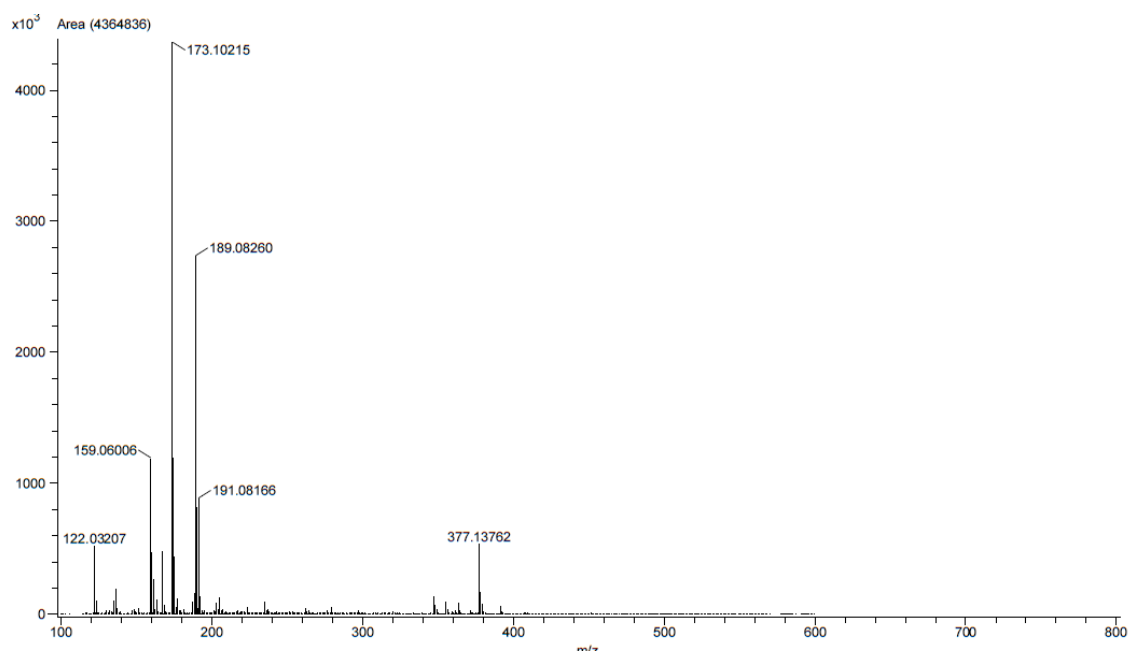

# <sup>1</sup>H-NMR spectrum of *N*-tosyl-4-heptylimidazole (11)

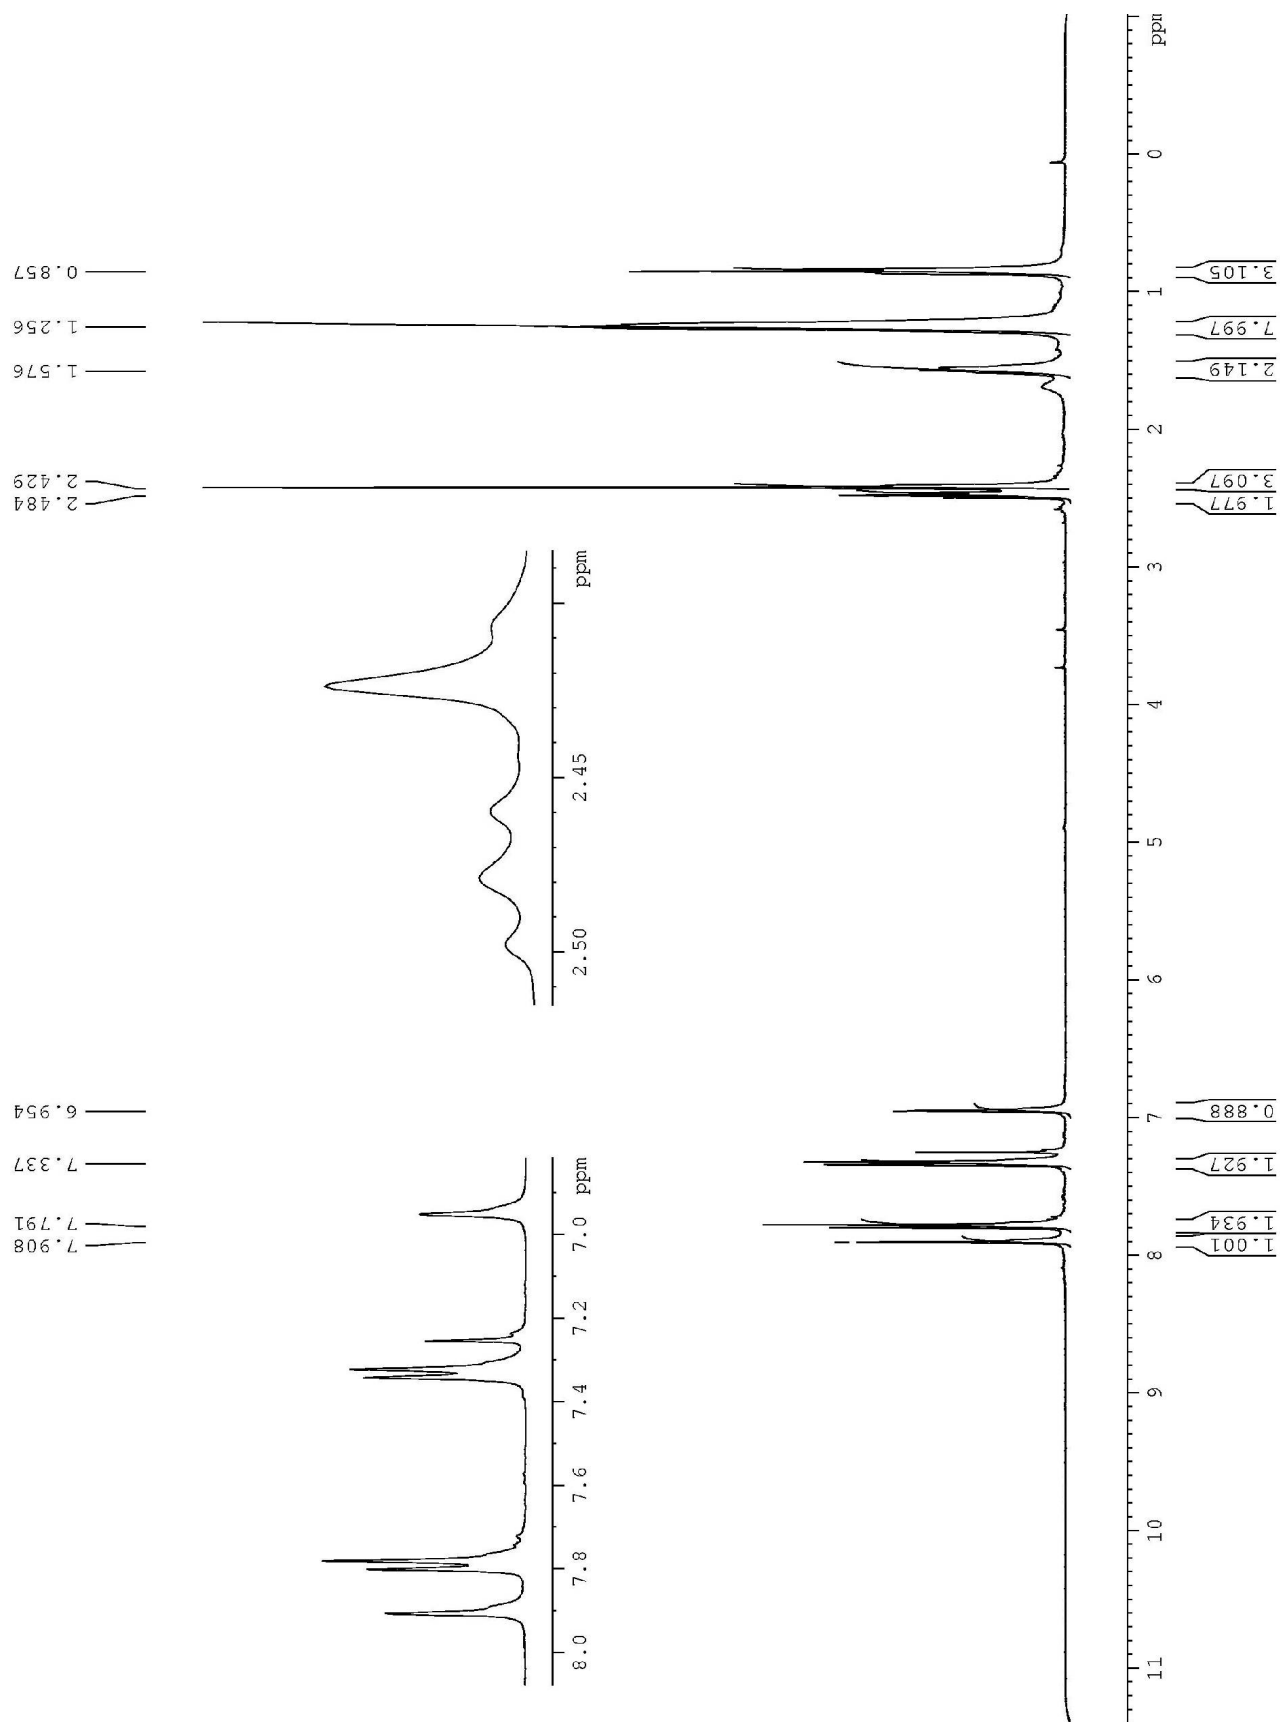

**<sup>13</sup>C-NMR spectrum of *N*-tosyl-4-heptylimidazole (11)**

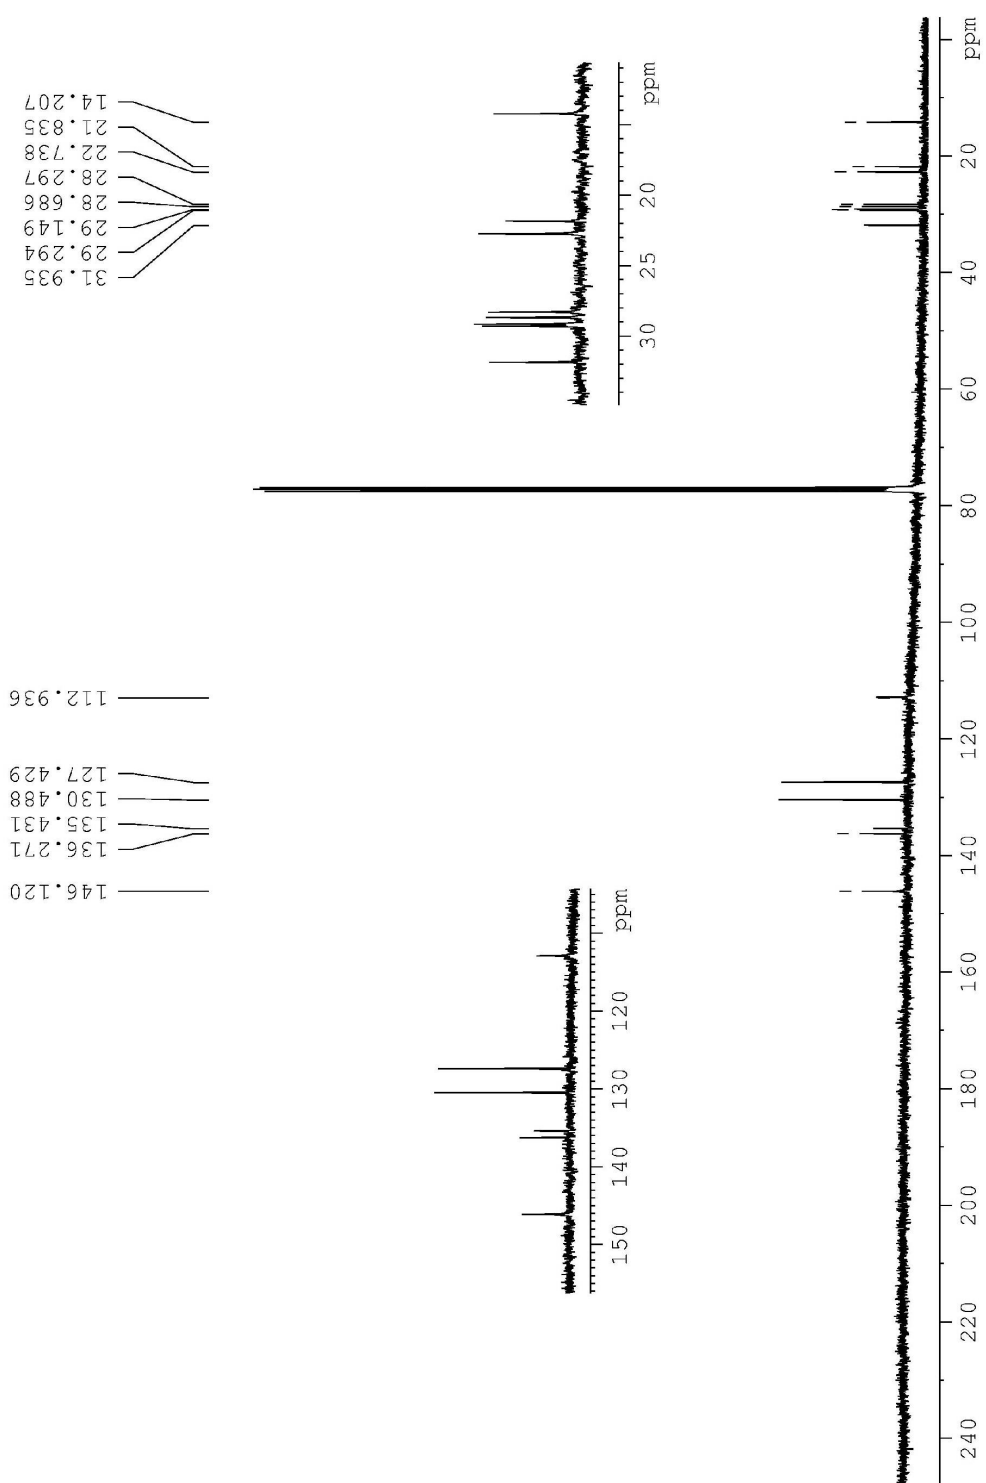

## HRMS spectrum of *N*-tosyl-4-heptylimidazole (11)

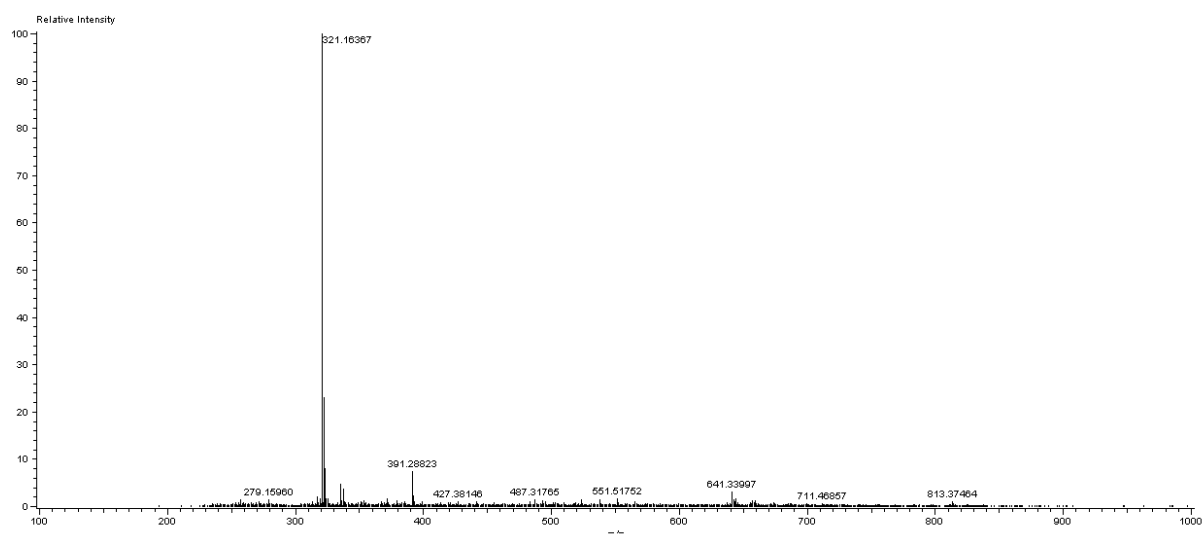



# <sup>1</sup>H-NMR spectrum of 4-(5)-heptyl-1H-imidazole (12)

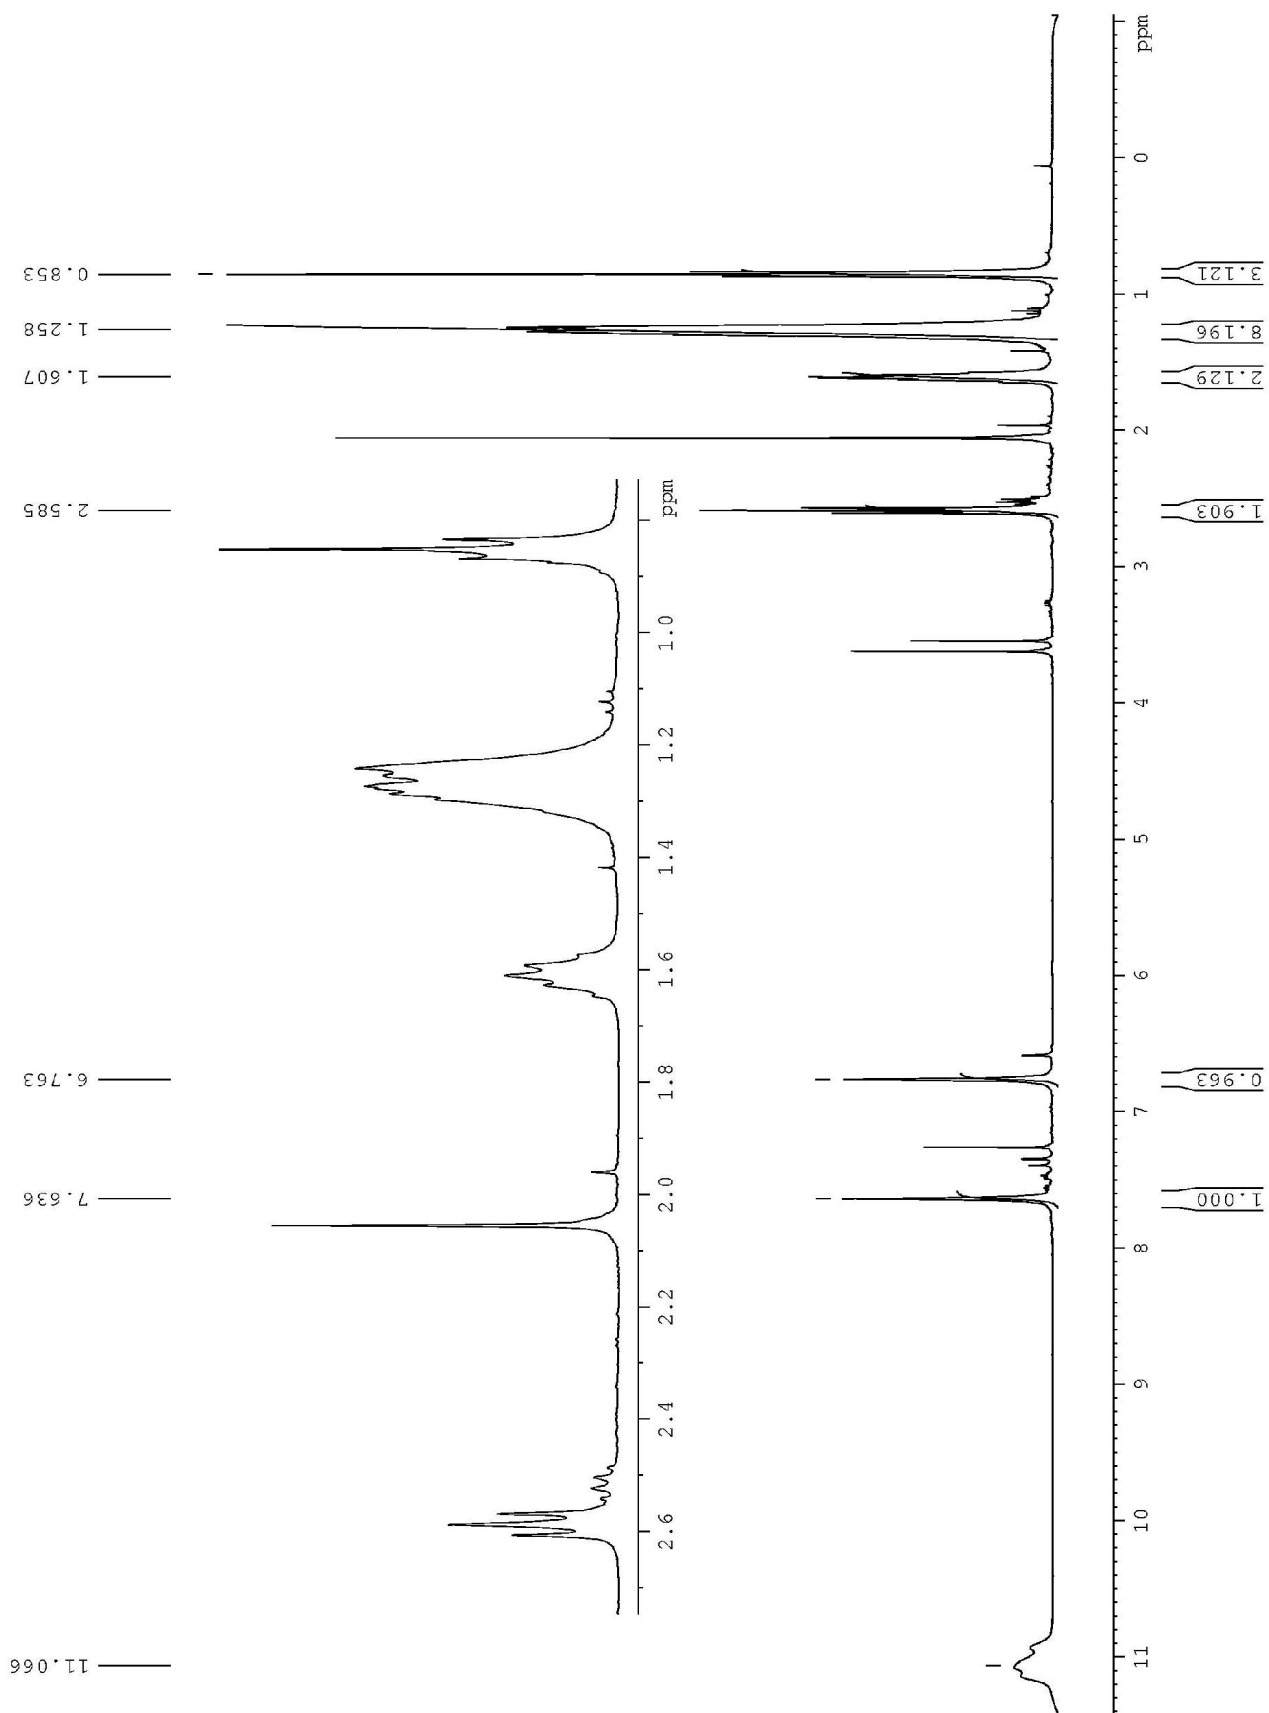

**<sup>13</sup>C-NMR spectrum of 4-(5)-heptyl-1H-imidazole (12)**

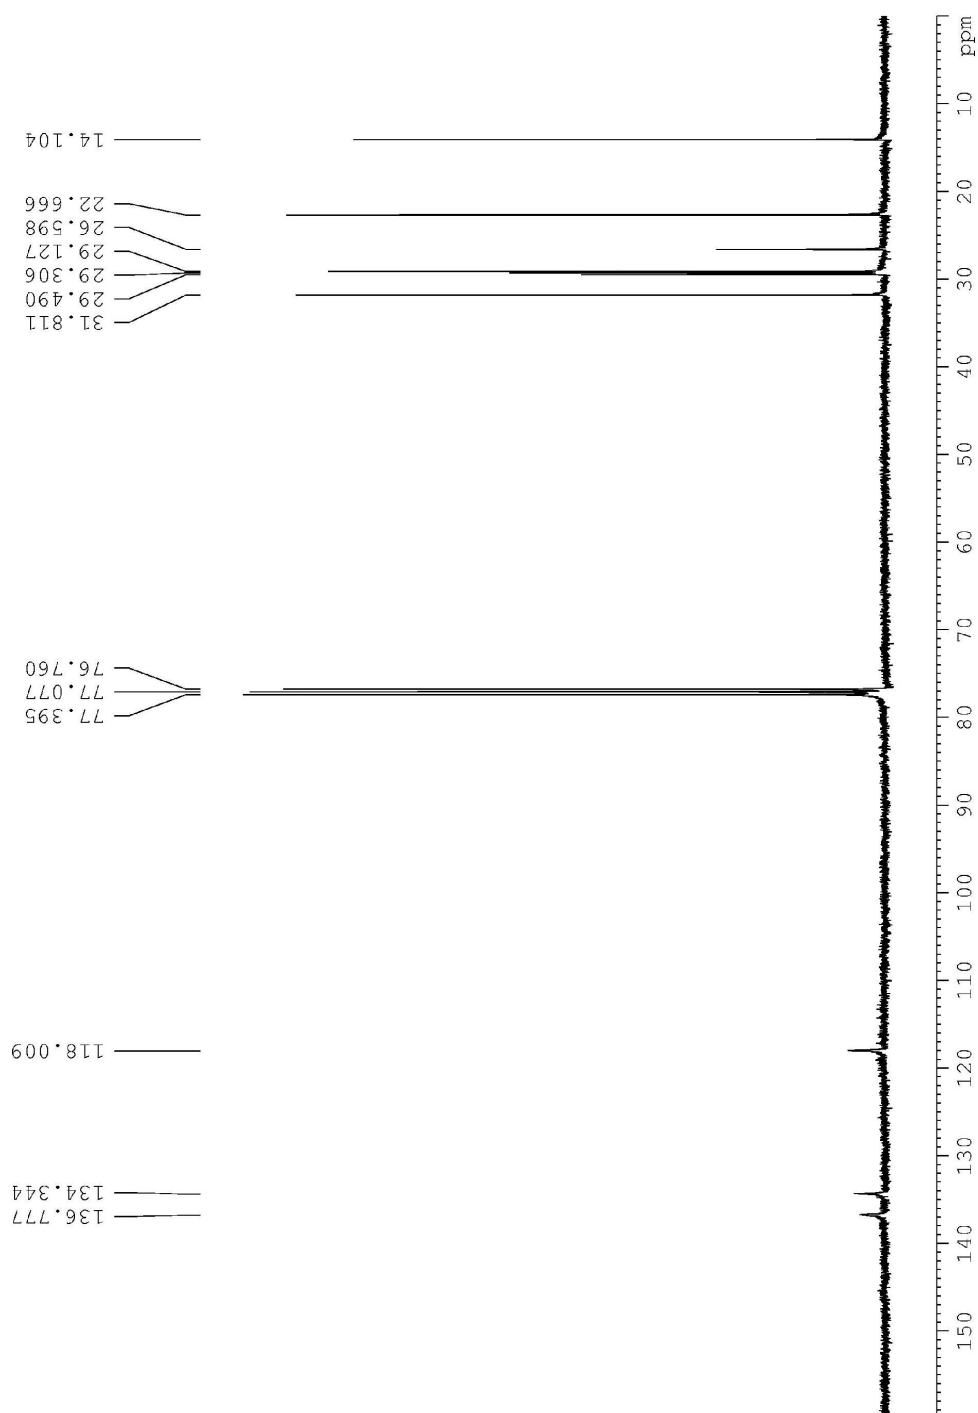

# HRMS spectrum of 4-(5)-heptyl-1H-imidazole (12)

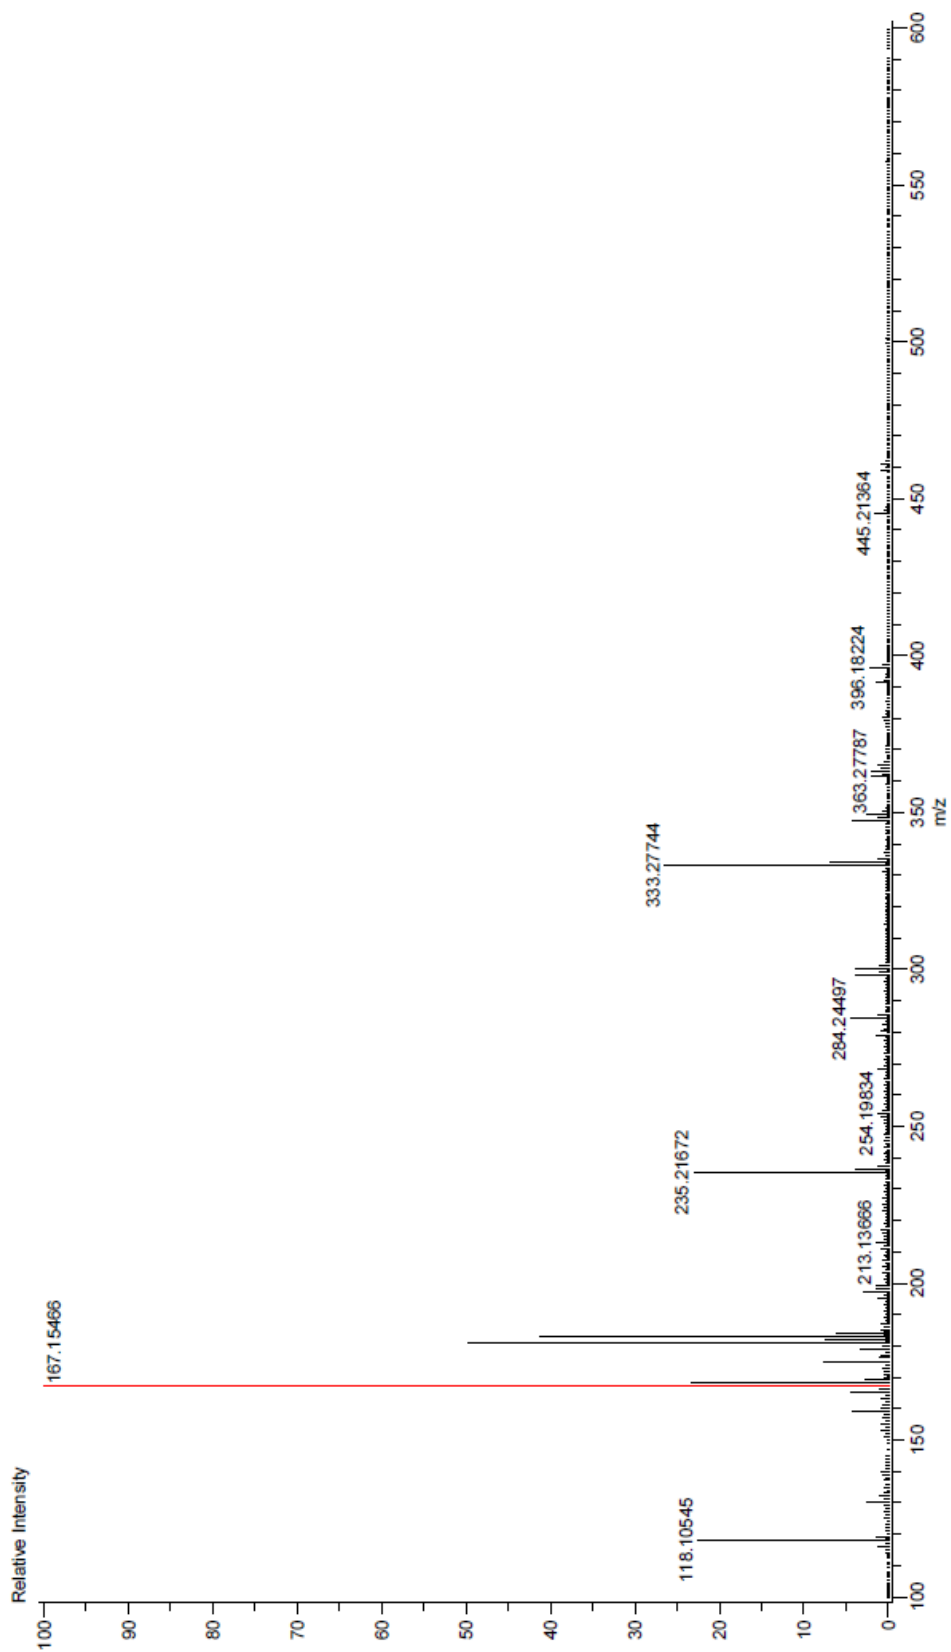

# <sup>1</sup>H-NMR spectrum of *N*-phenyl-4-heptylimidazole (13)

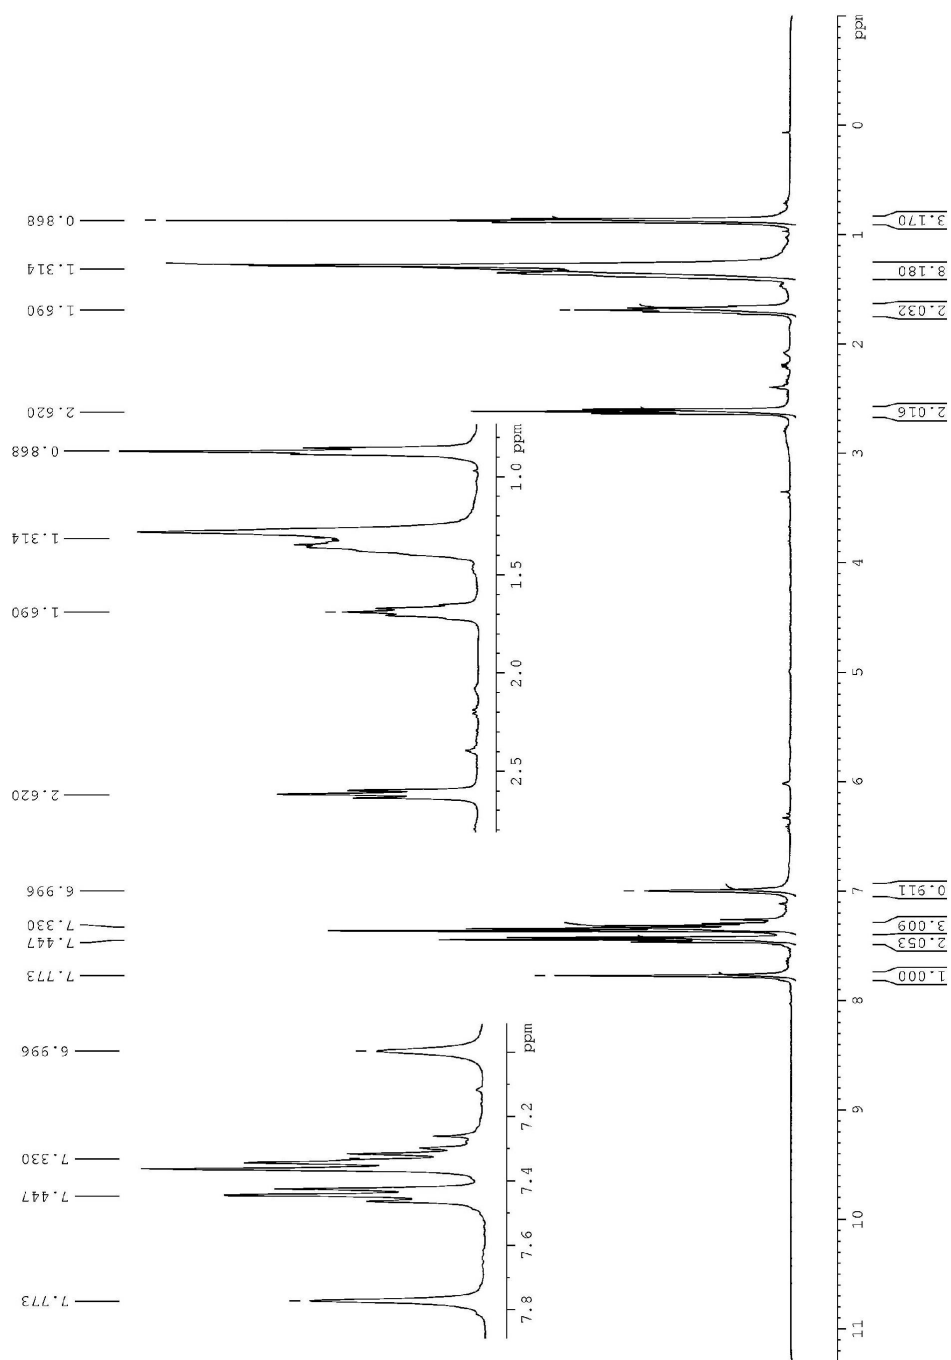

**<sup>13</sup>C-NMR spectrum of *N*-phenyl-4-heptylimidazole (13)**

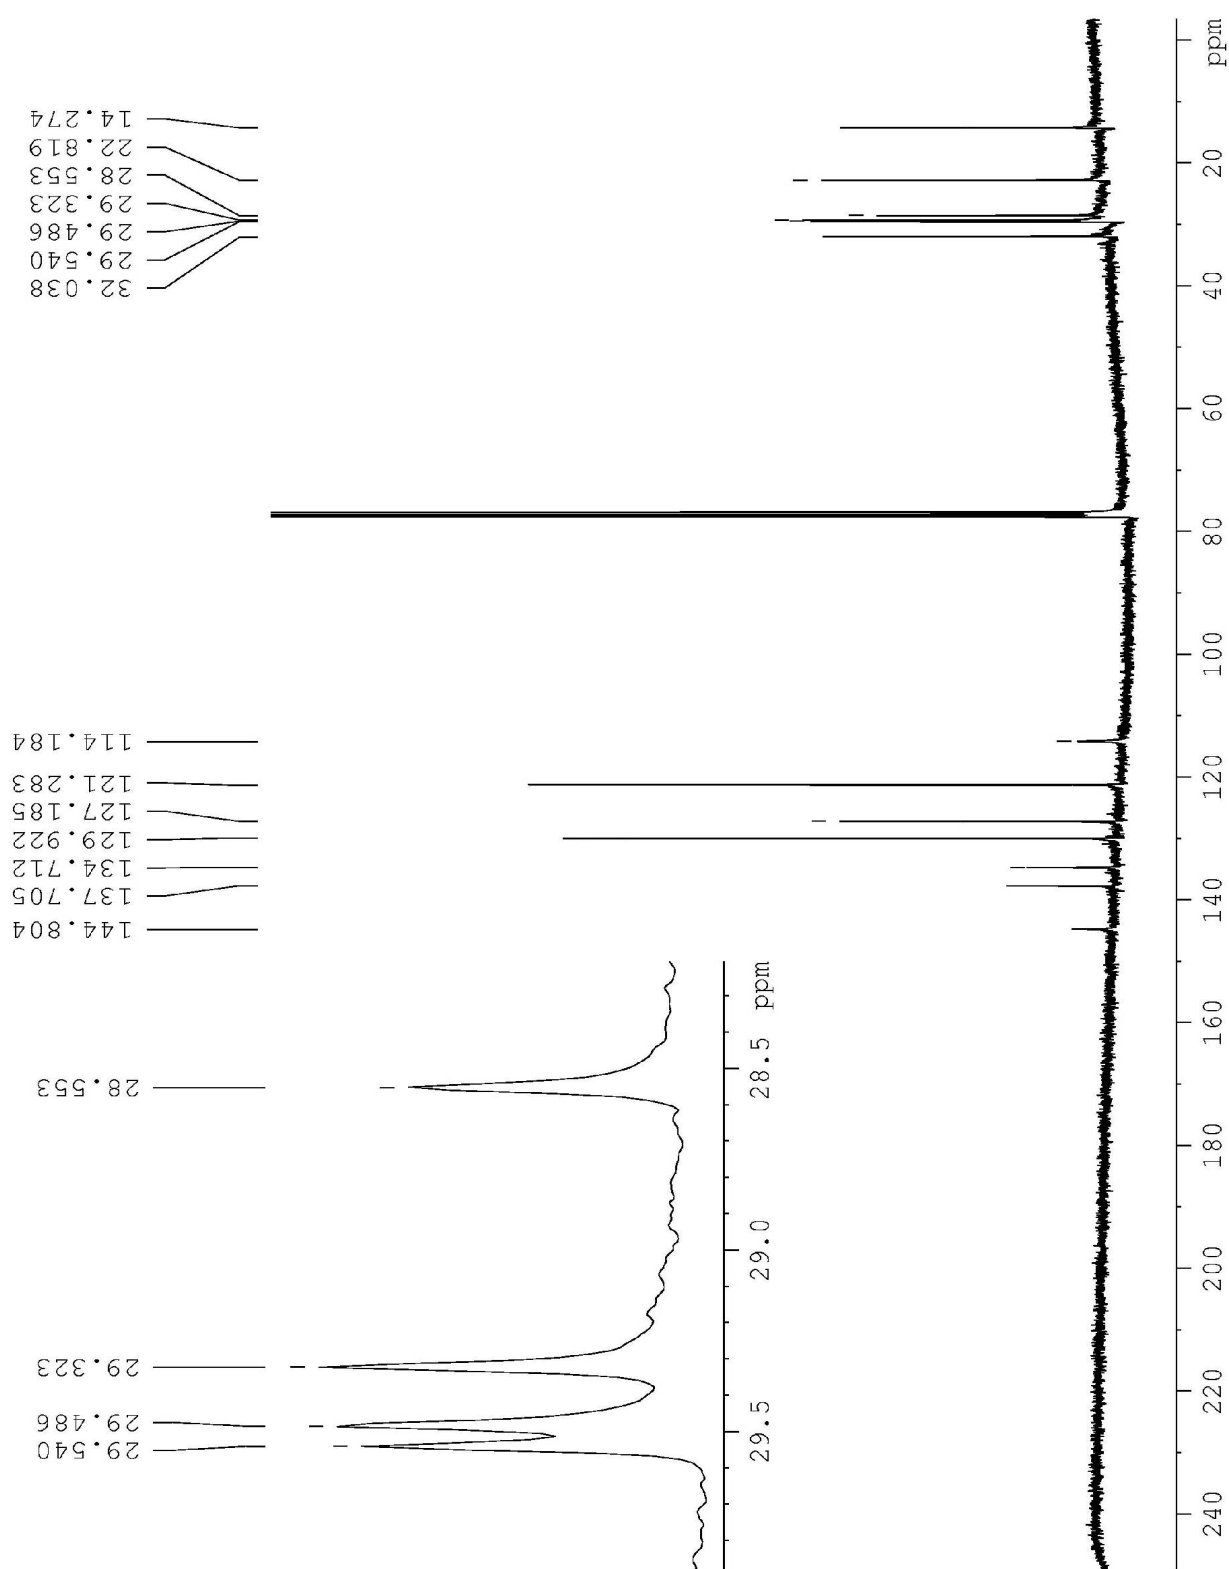

# HRMS spectrum of *N*-phenyl-4-heptylimidazole (13)

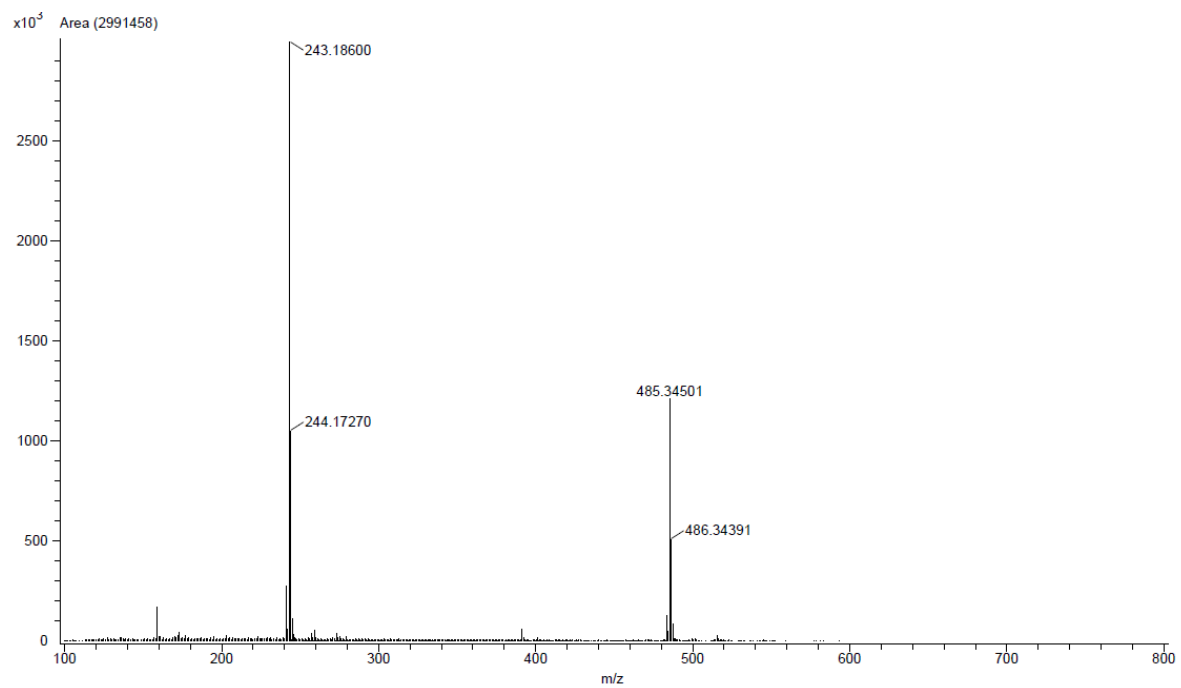

COSY 2D-NMR spectrum of *N*-phenyl-4-heptylimidazole (13)

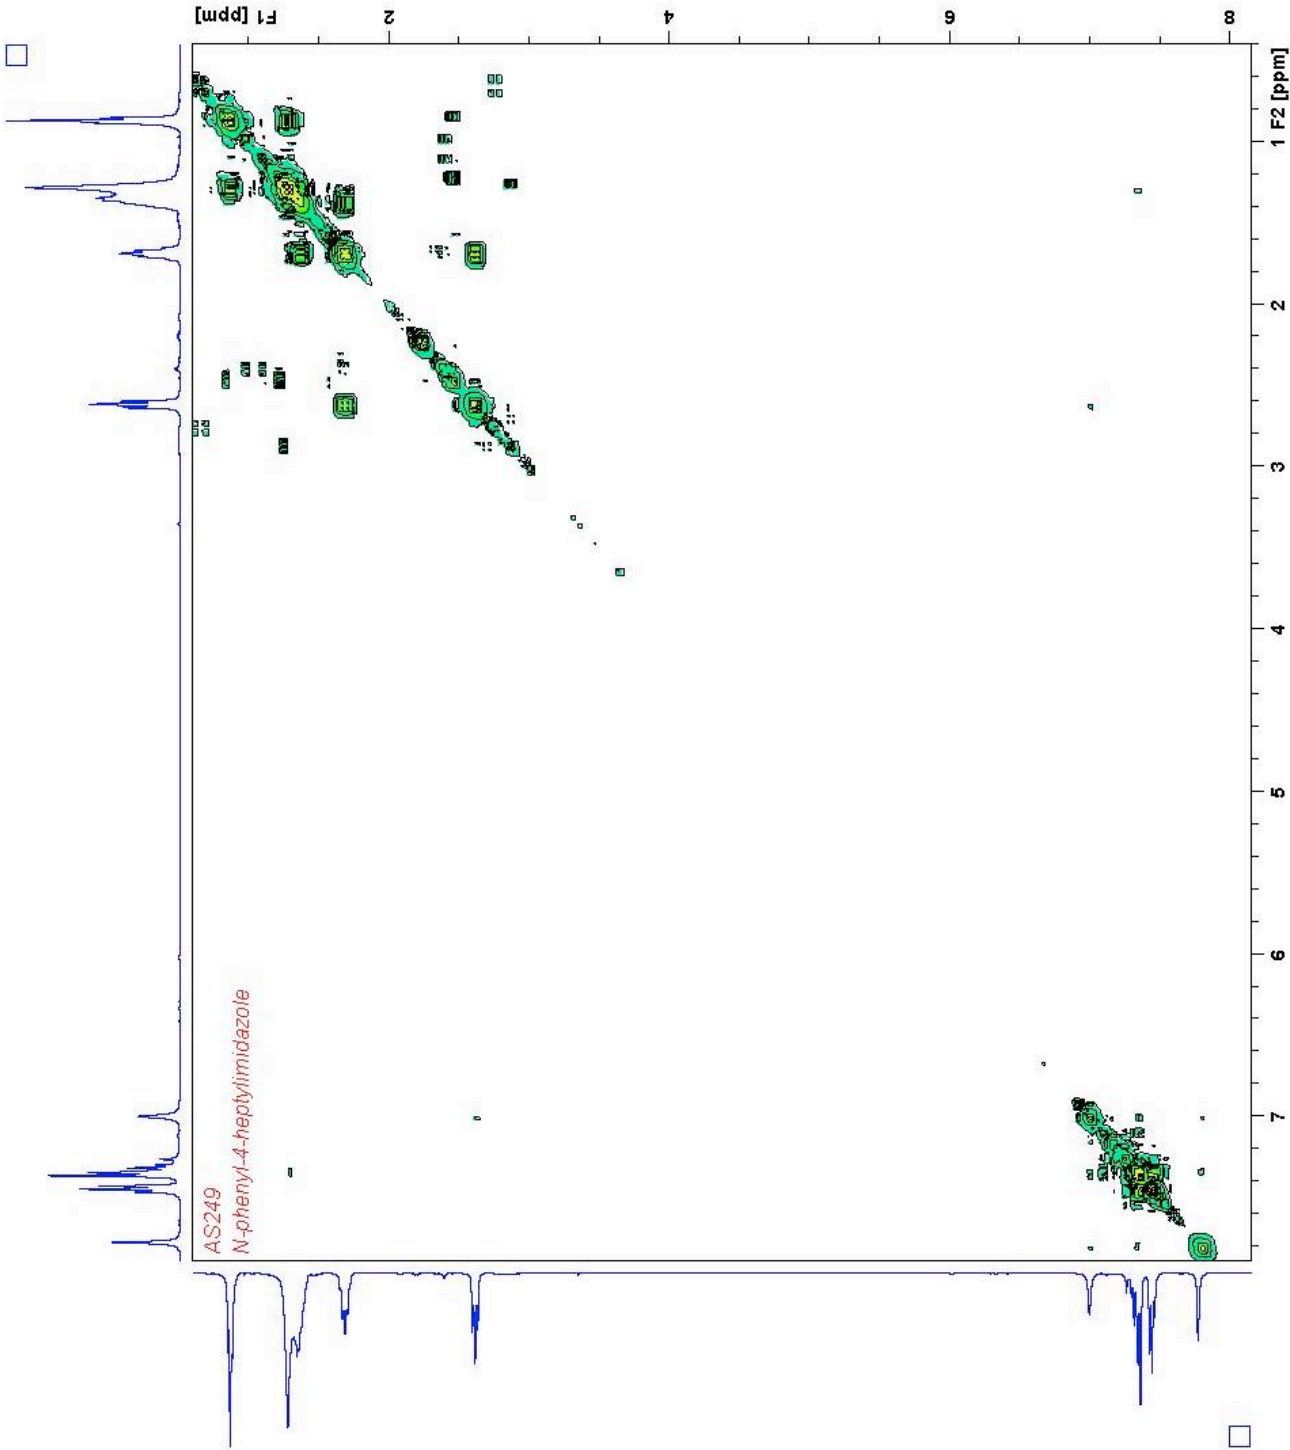

**<sup>1</sup>H-NMR spectrum of *N*-1-phenyl-*N*-3-methyl-4-heptylimidazolium iodide (14)**

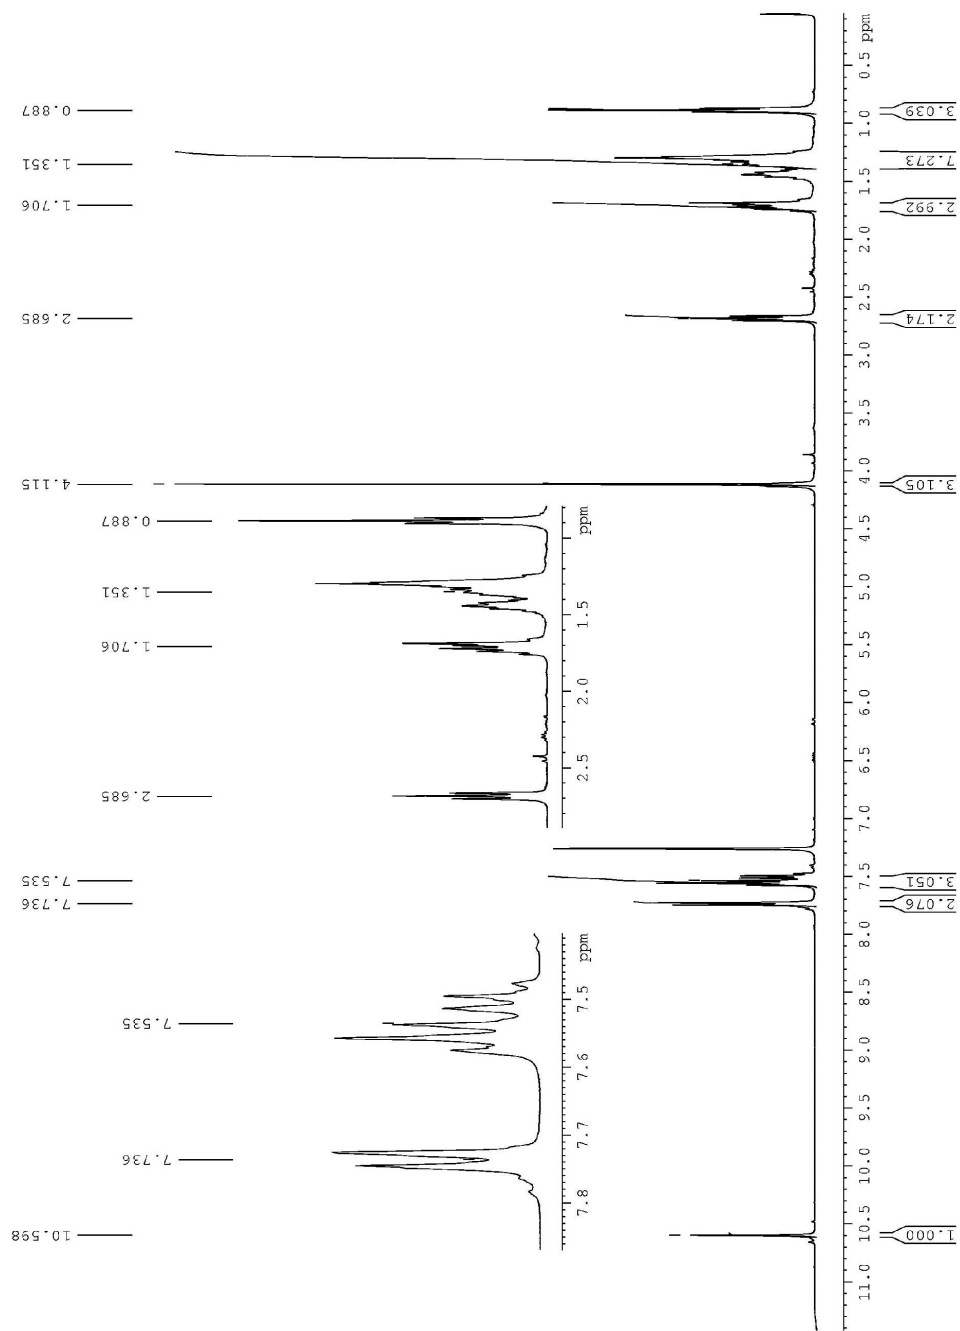



**<sup>13</sup>C-NMR spectrum of *N*-1-phenyl-*N*-3-methyl-4-heptylimidazolium iodide (14)**

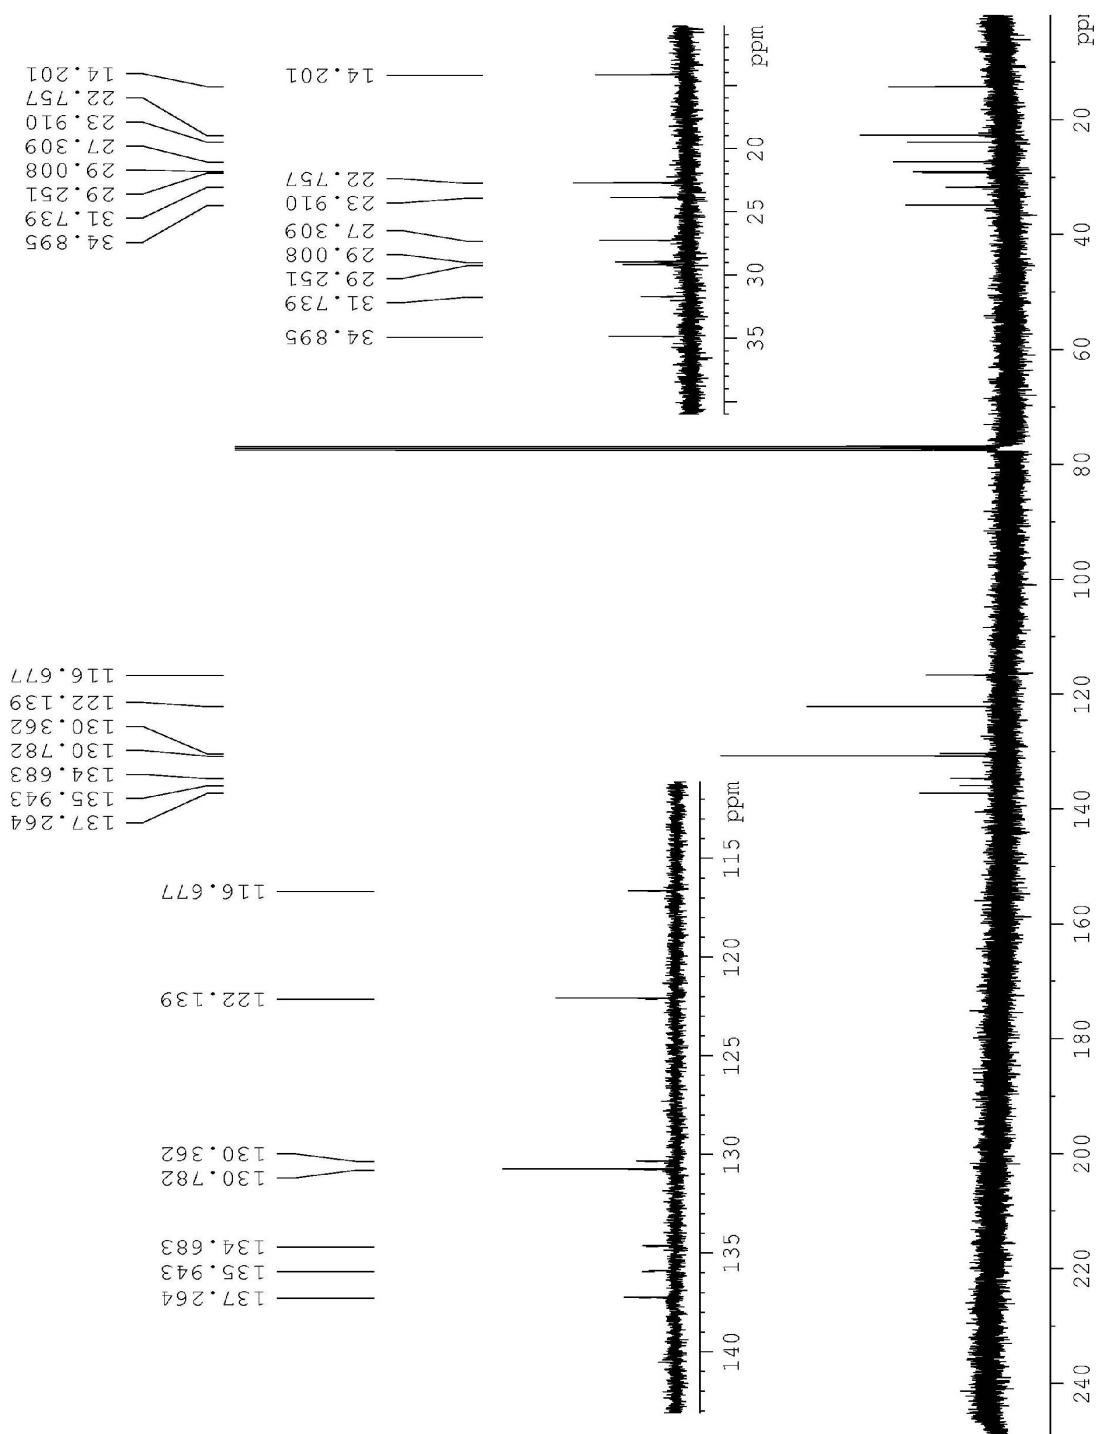

# <sup>1</sup>H-NMR spectrum of NHC-2

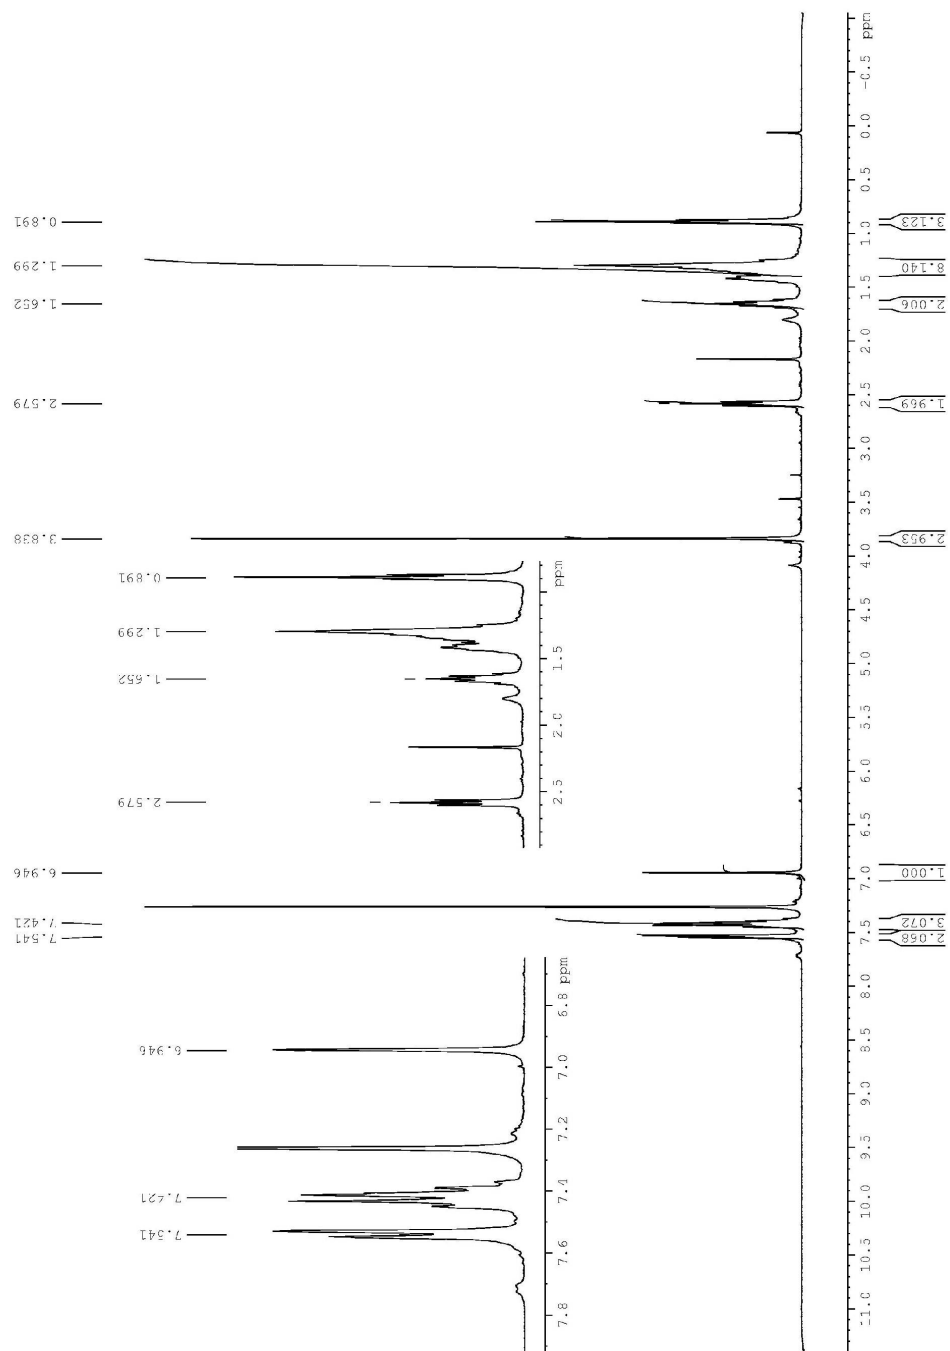

# <sup>13</sup>C-NMR spectrum of NHC-2

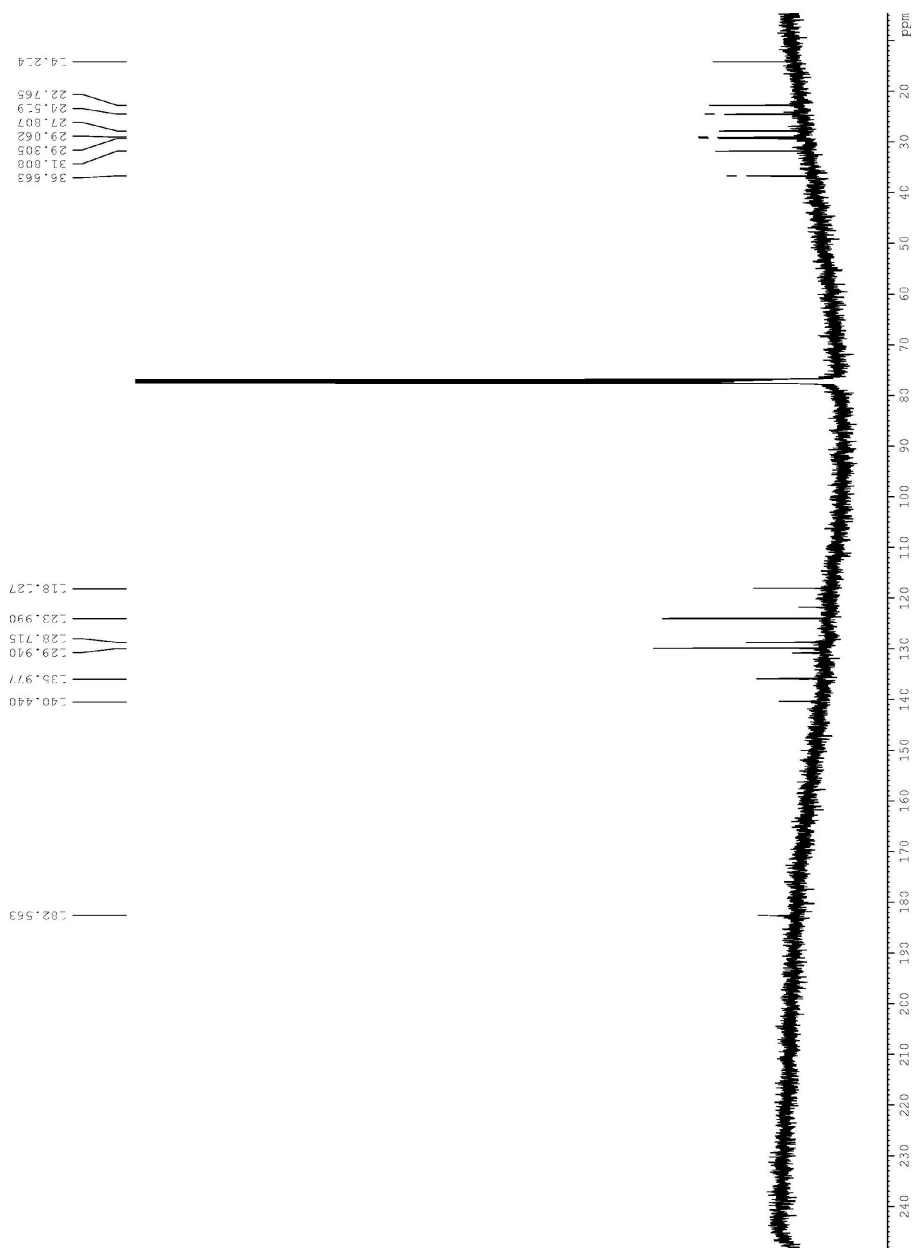

## HRMS spectrum of NHC-2

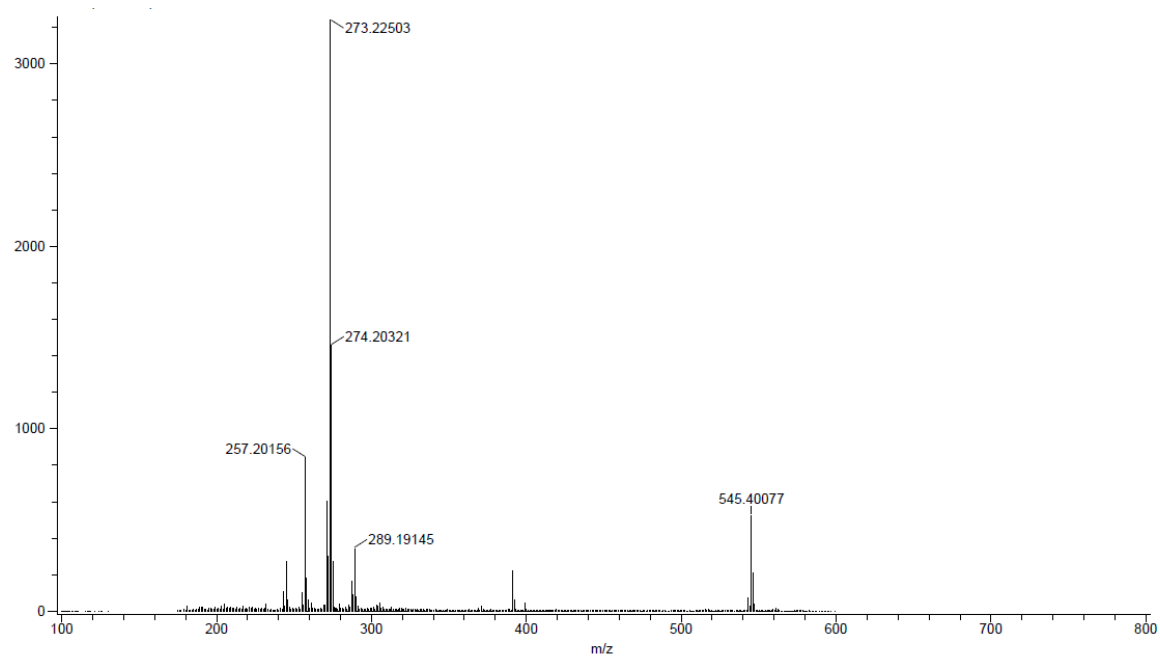

2D COSY-NMR spectrum NHC-2

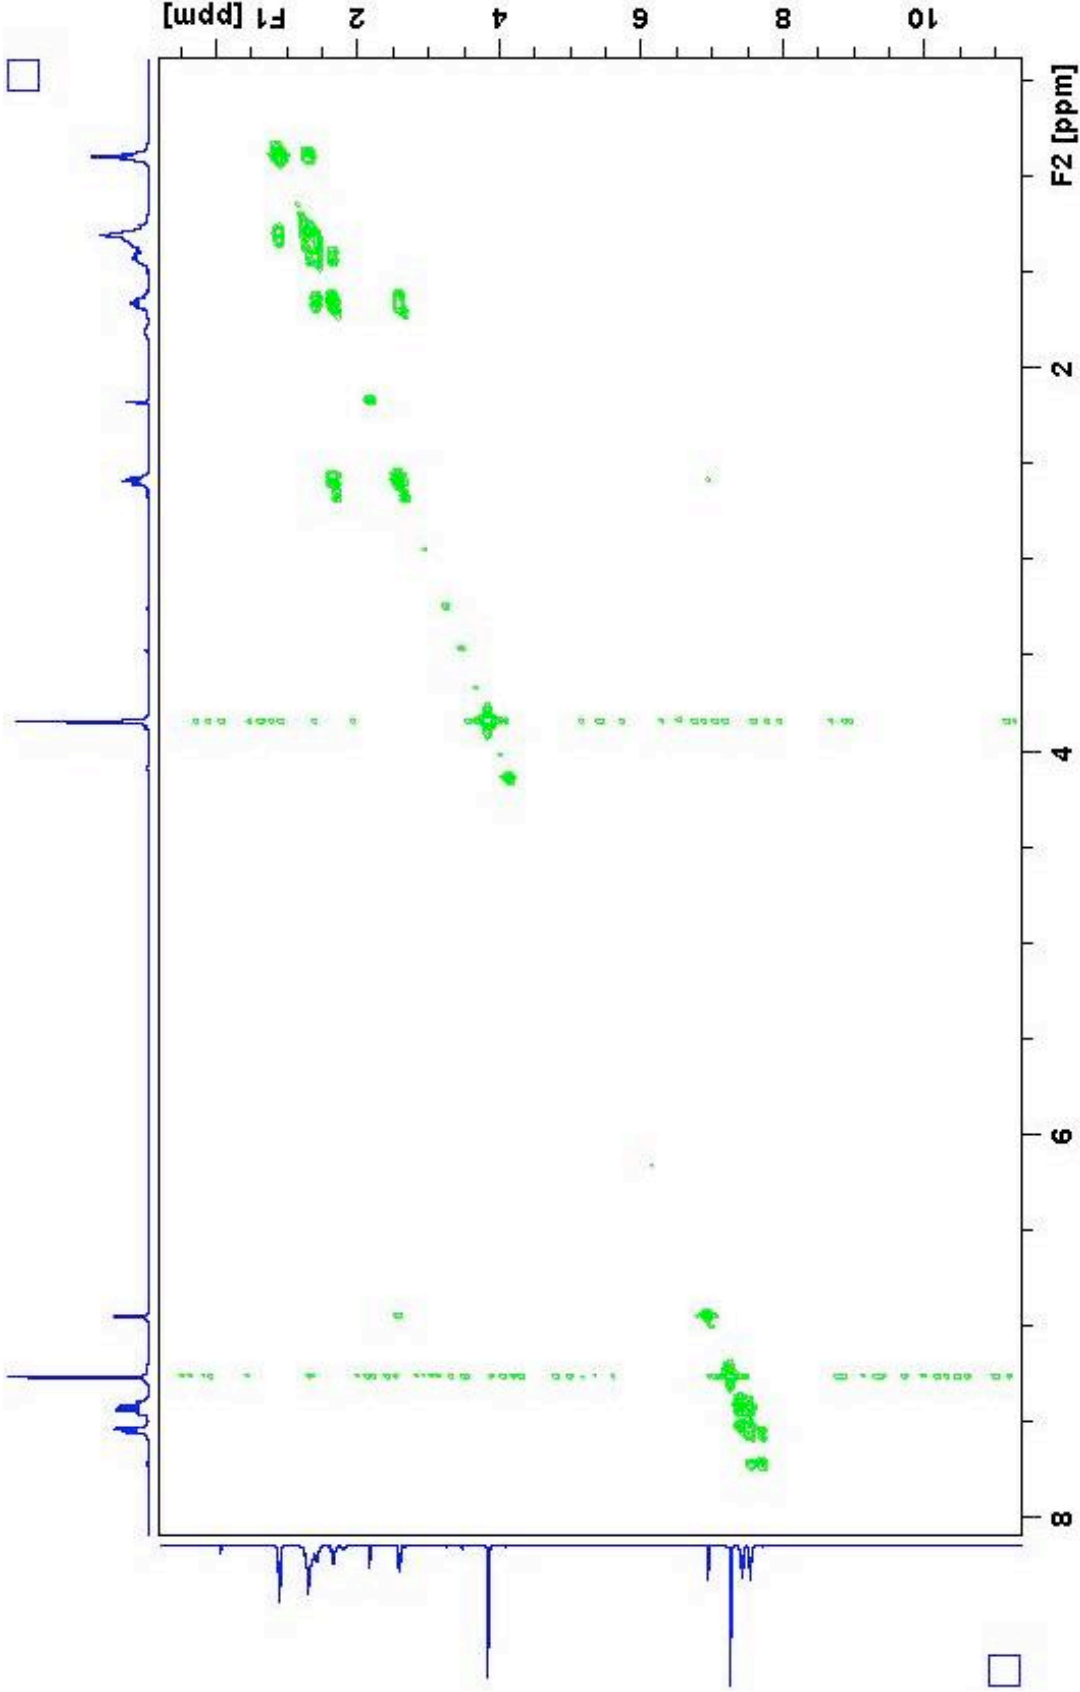

# <sup>1</sup>H-NMR spectrum of *N*-tosyl-4-(2-phenylethyl)imidazole (15)

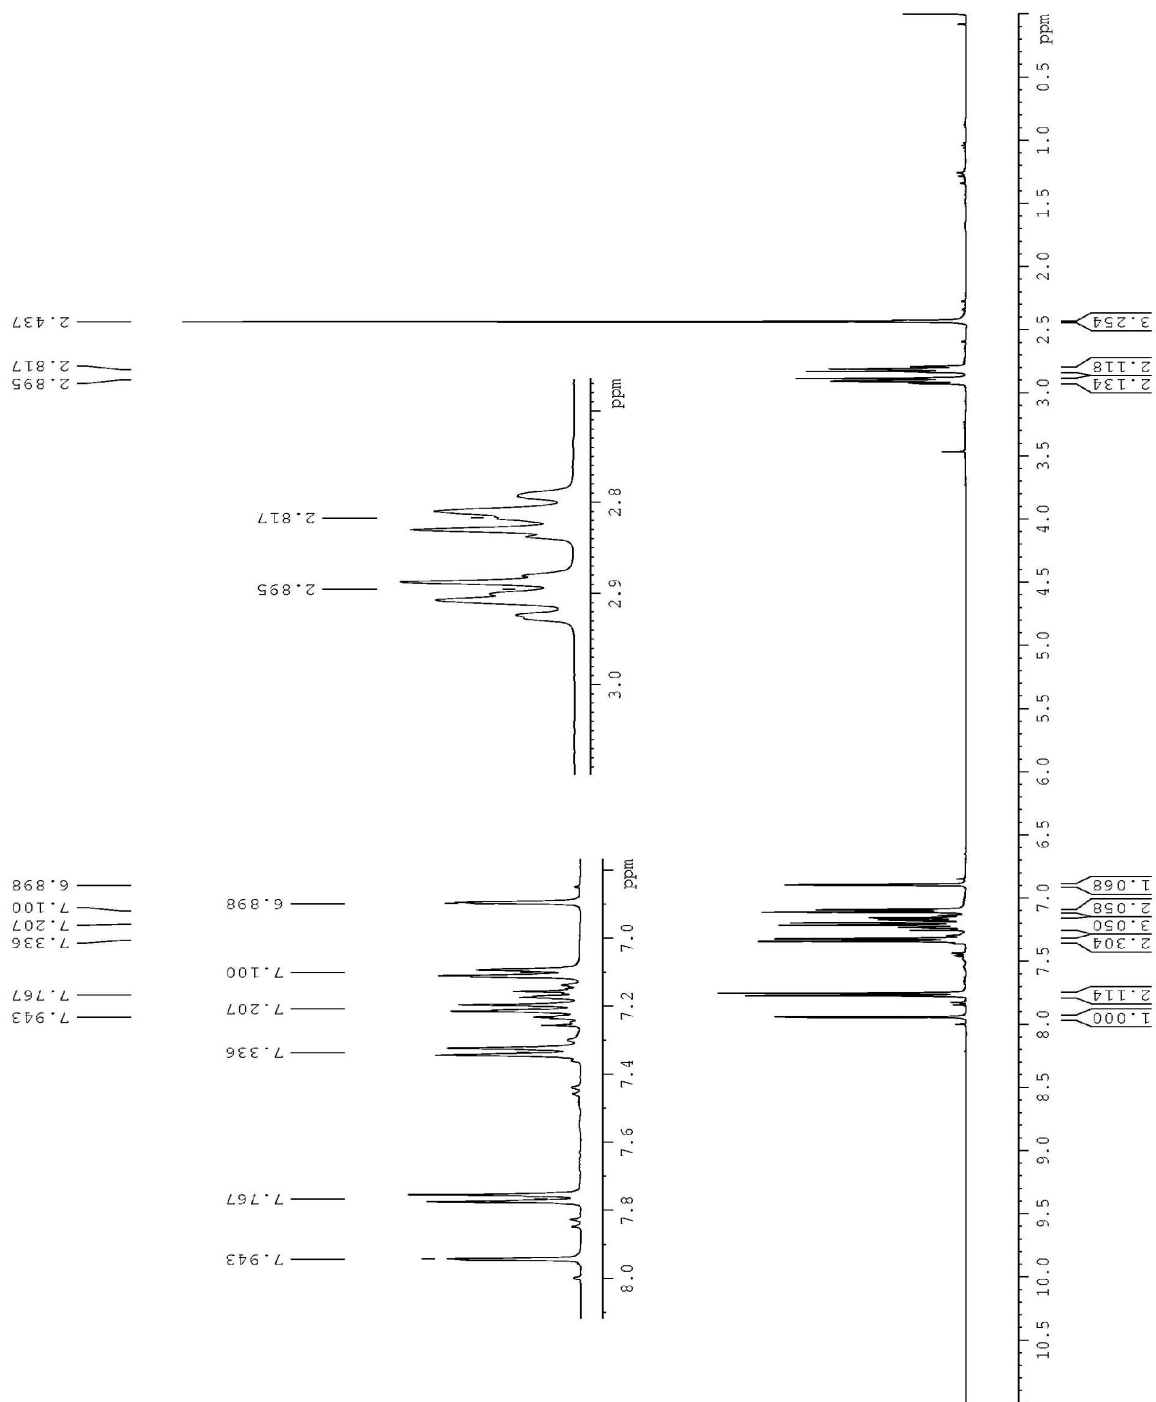

**<sup>13</sup>C-NMR spectrum of *N*-tosyl-4-(2-phenylethyl)imidazole (15)**

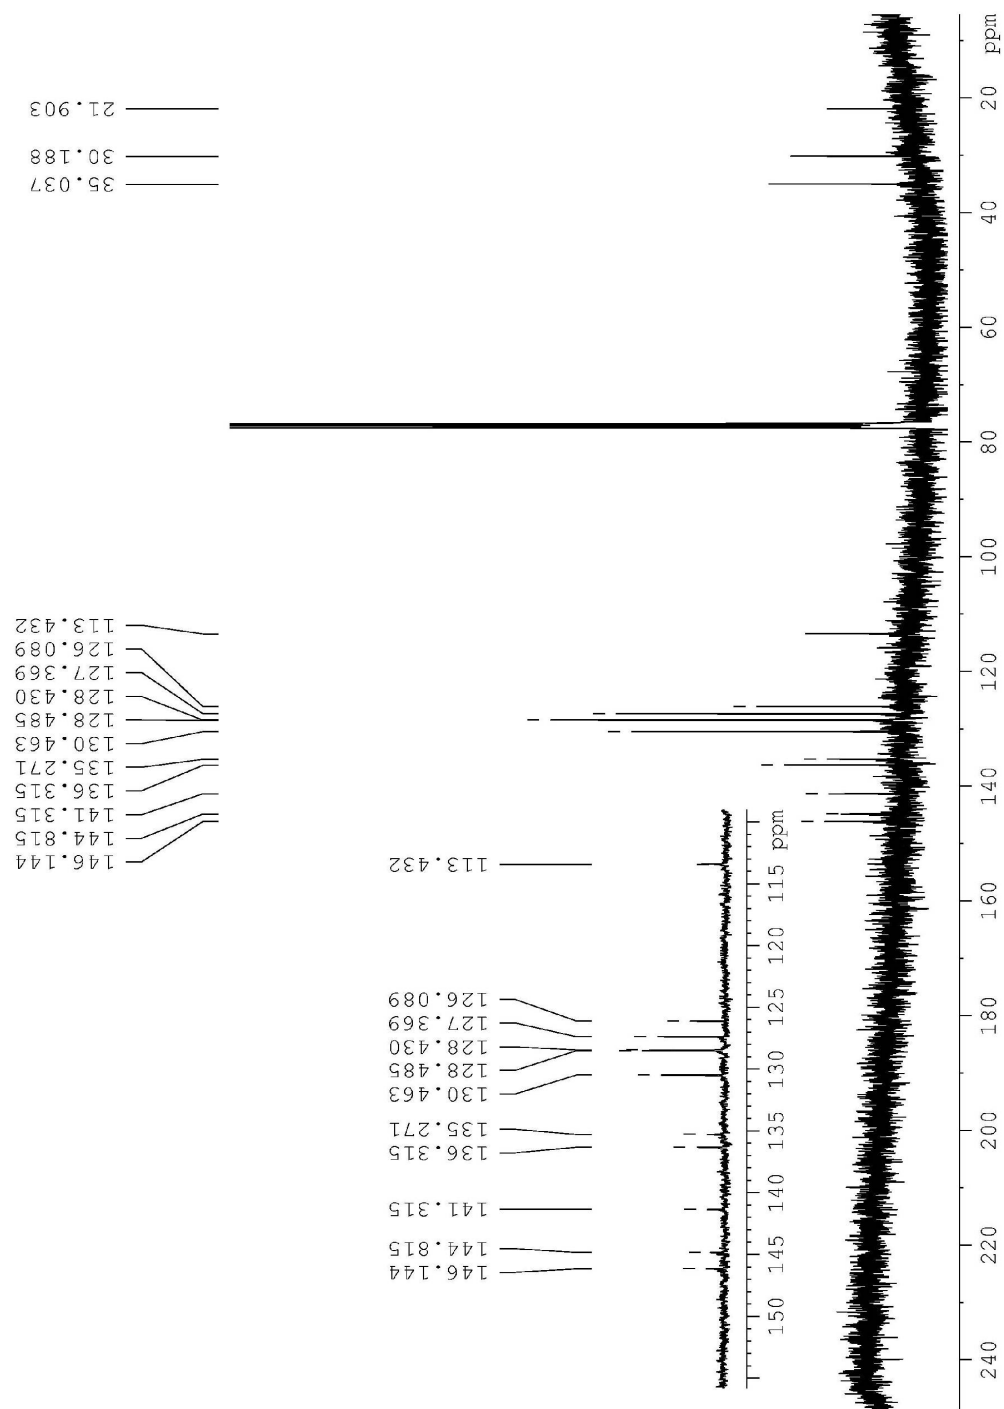

## HRMS spectrum of *N*-tosyl-4-(2-phenylethyl)imidazole (15)

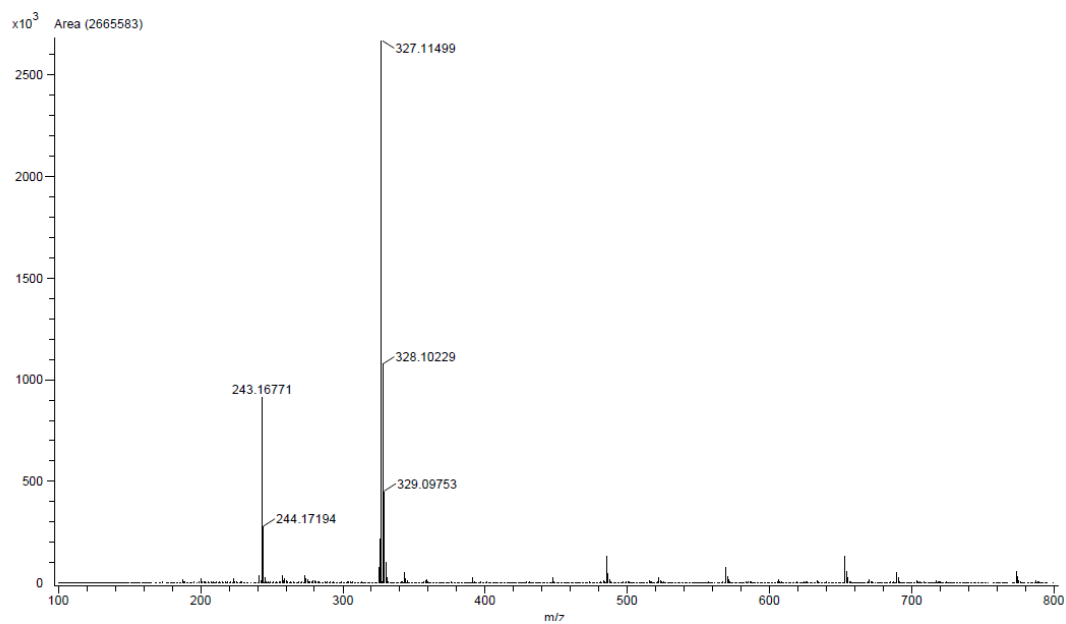



# <sup>1</sup>H-NMR spectrum of 4-(5)-(2-phenylethyl)-1H-imidazole (16)

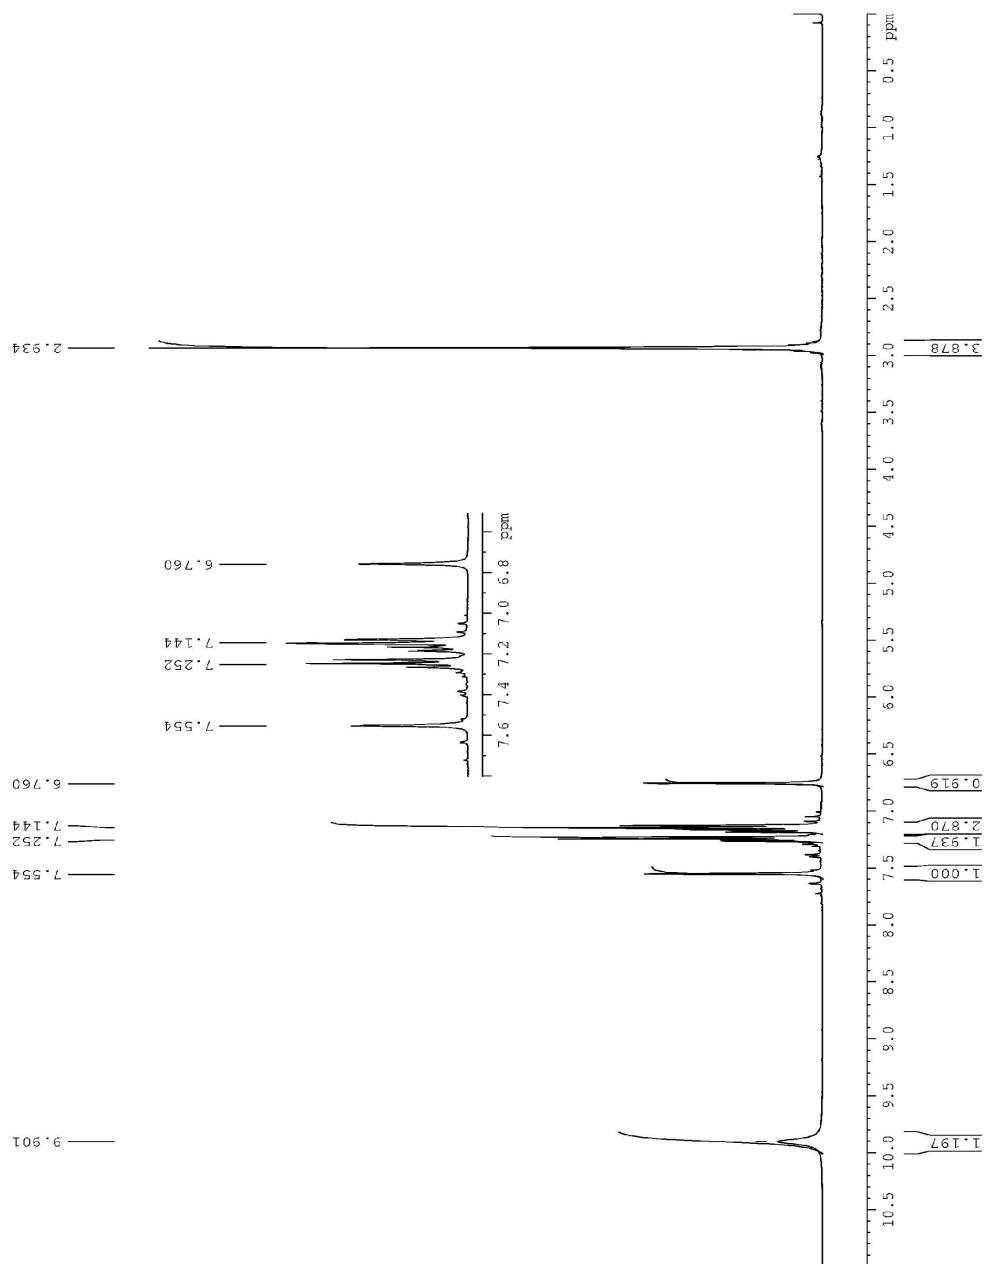

**<sup>13</sup>C-NMR spectrum of 4-(5)-(2-phenylethyl)-1H-imidazole (16)**

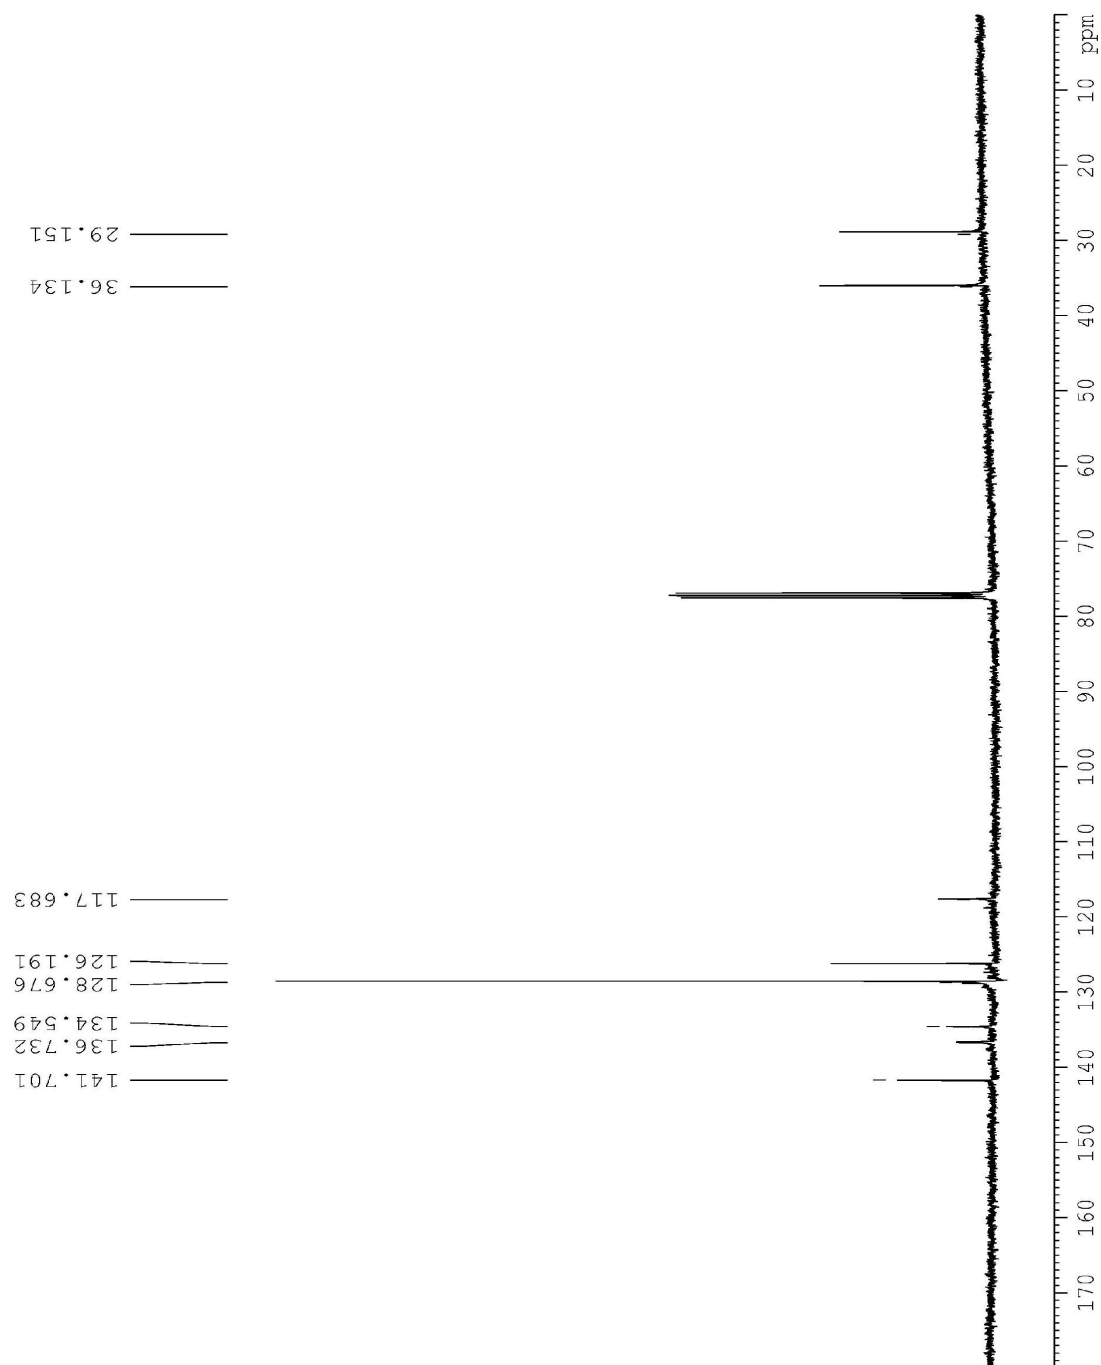

# HRMS spectrum of 4-(5)-(2-phenylethyl)-1H-imidazole (16)

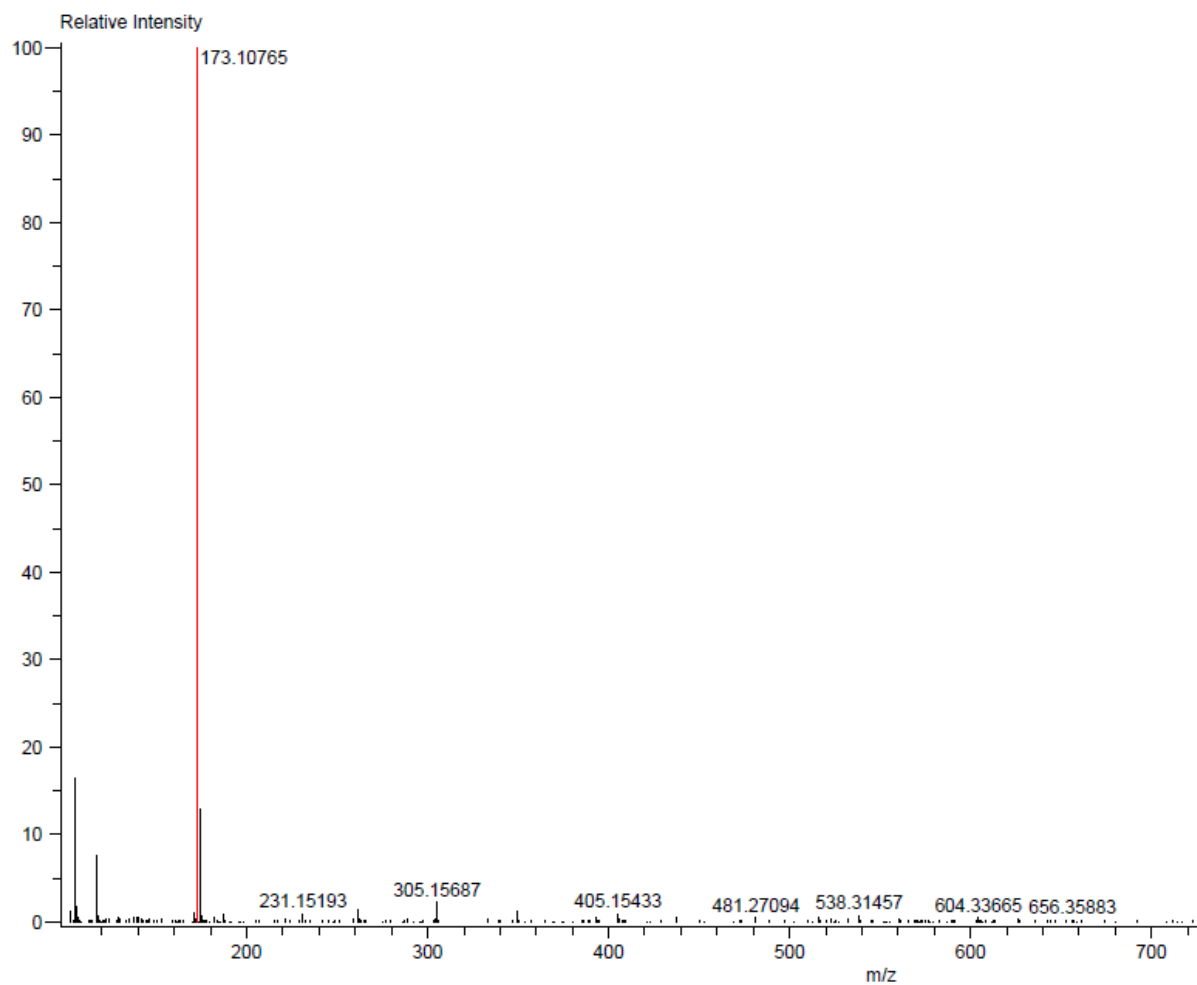

# <sup>1</sup>H-NMR spectrum of *N*-tosyl-4-decylimidazole (17)

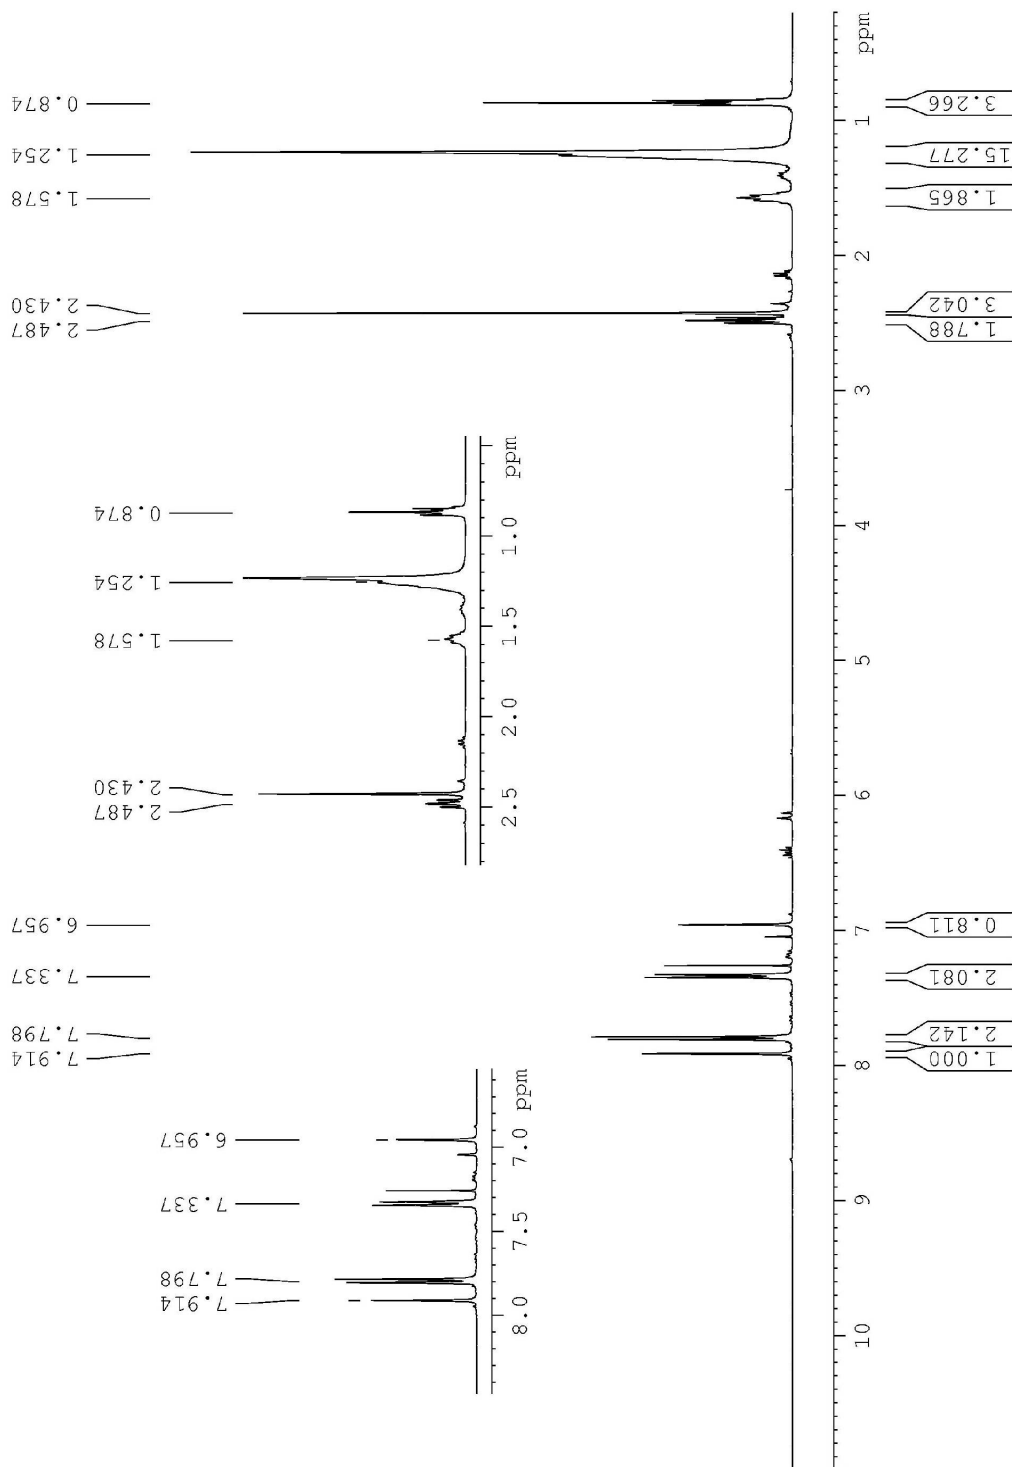

# <sup>13</sup>C-NMR spectrum of *N*-tosyl-4-decylimidazole (17)

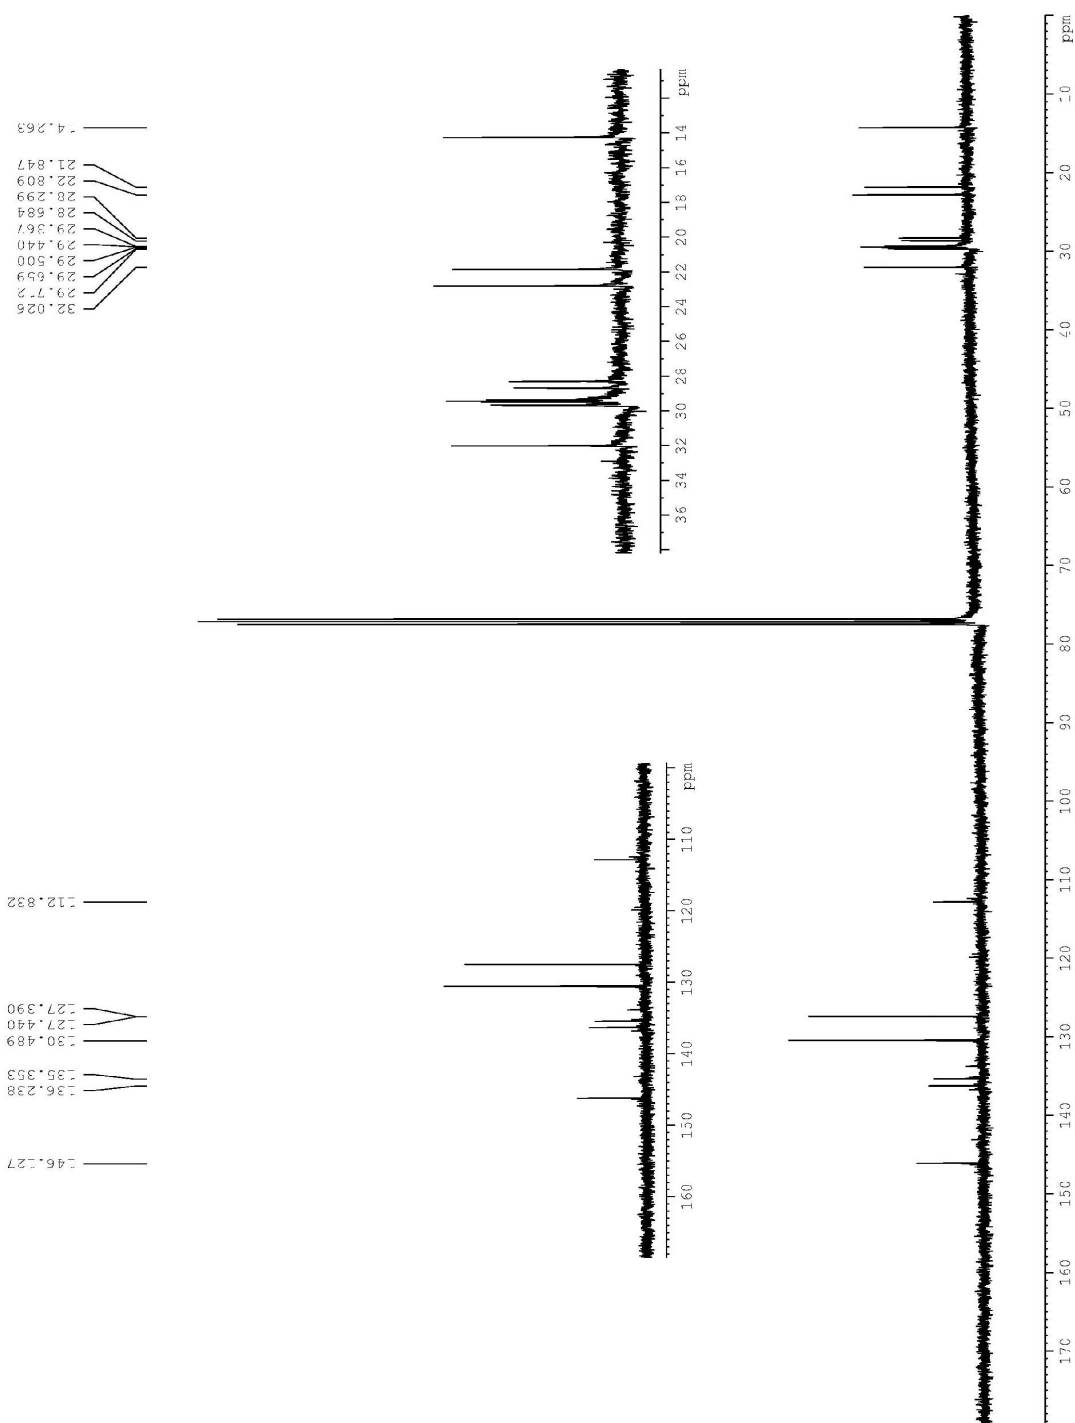

## HRMS spectrum of *N*-tosyl-4-decylimidazole (17)

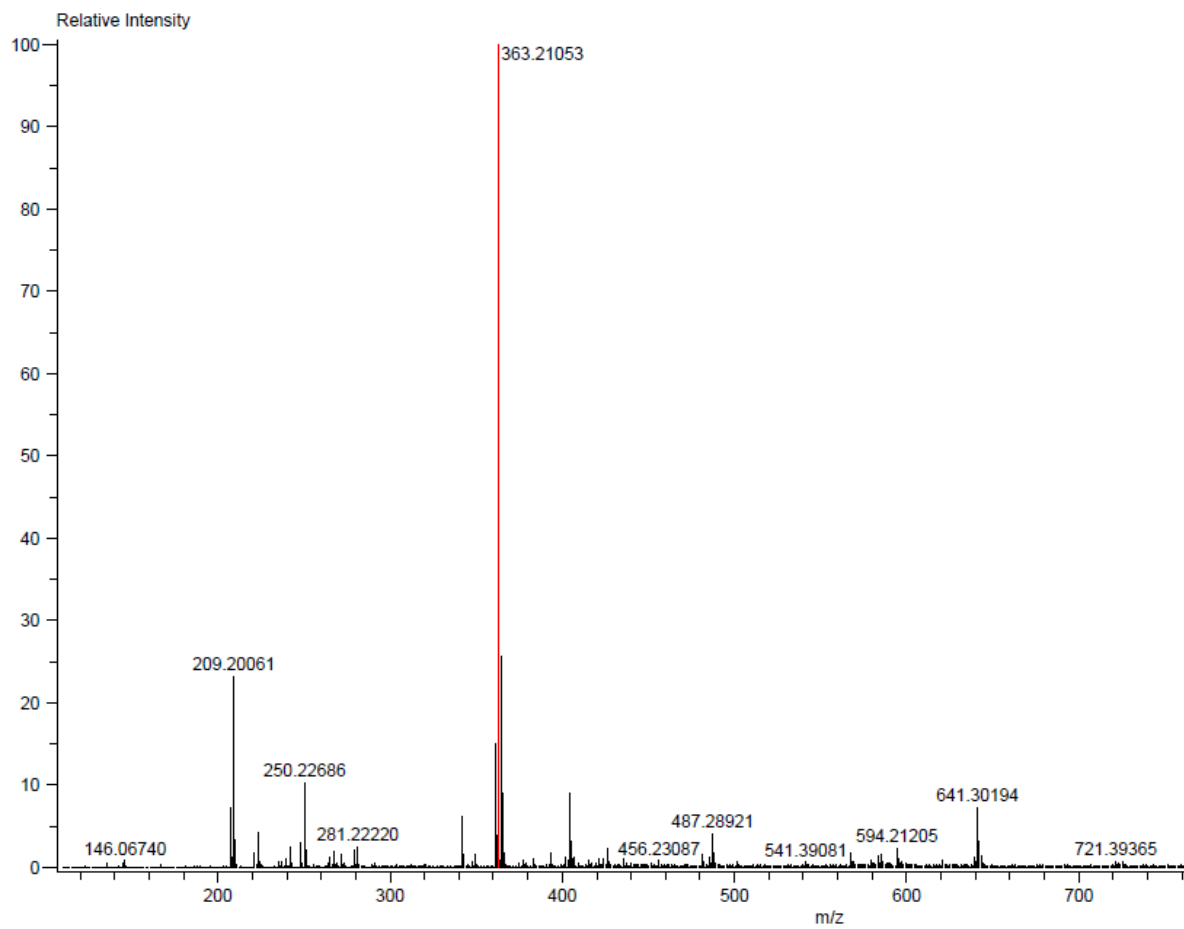

# COSY-NMR spectrum of *N*-tosyl-4-decyimidazole (17)

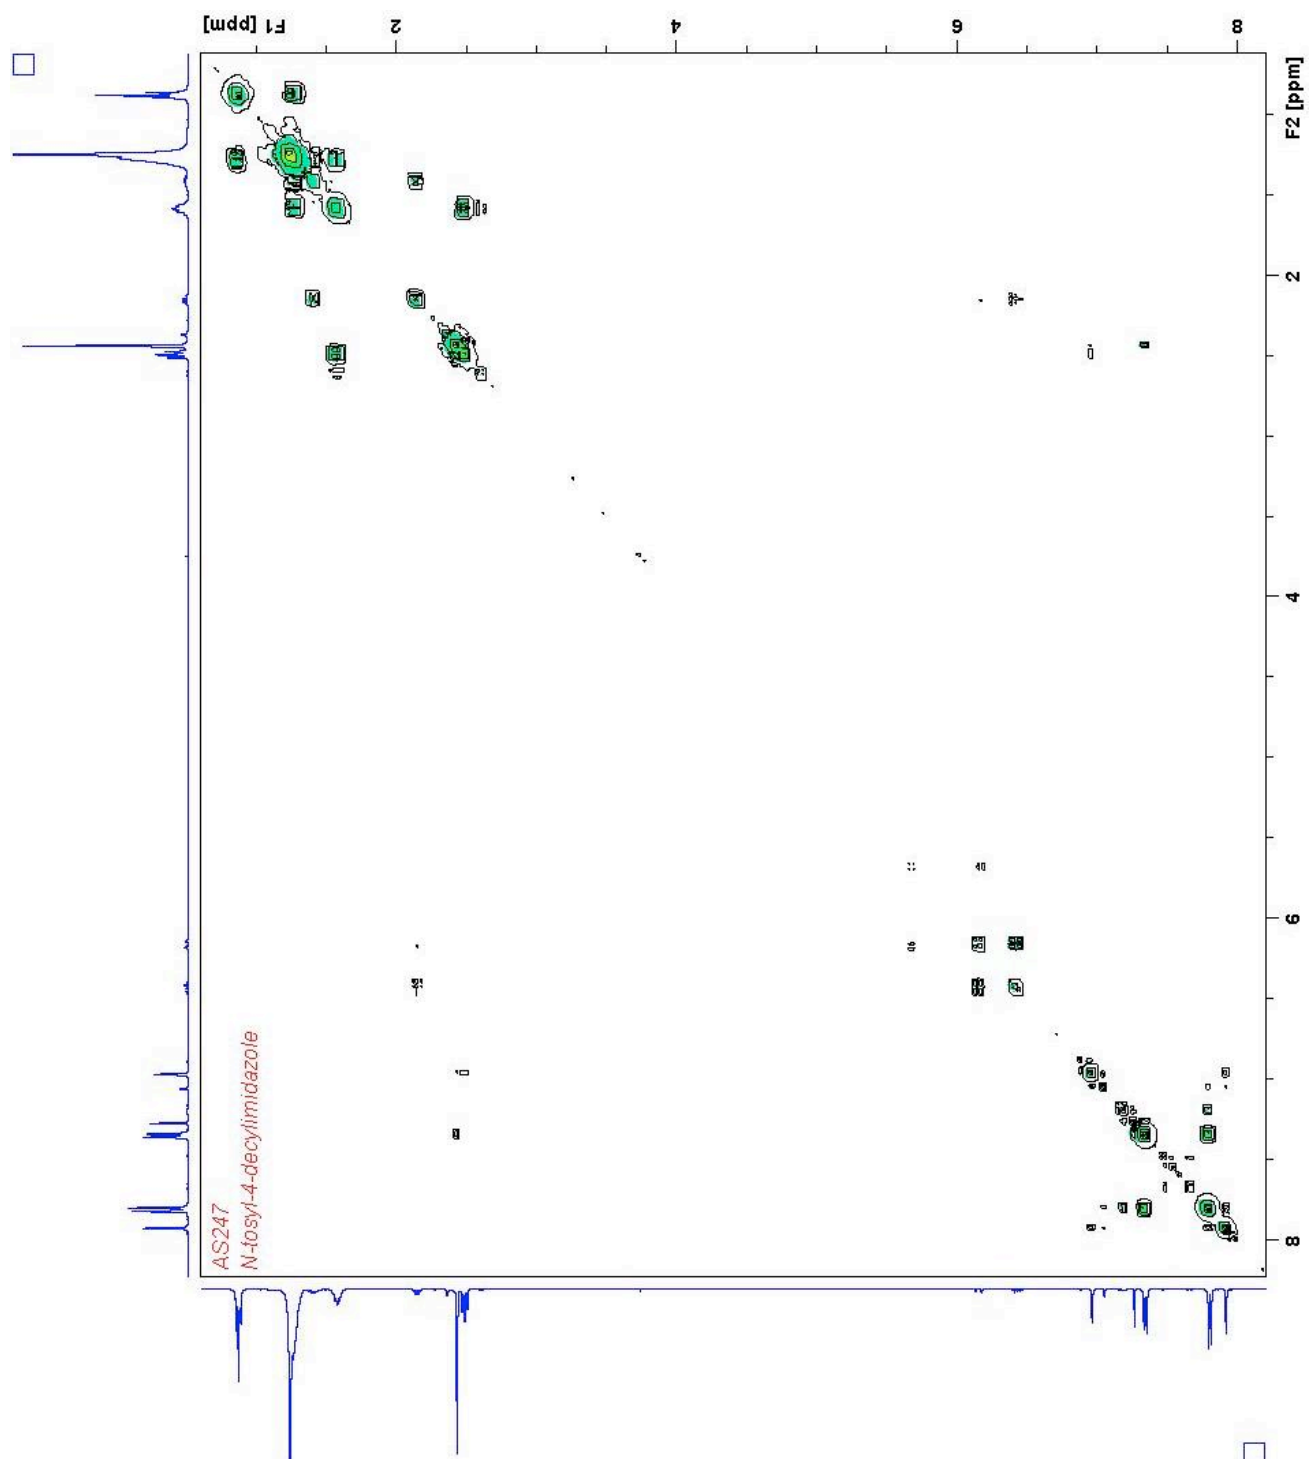

# <sup>1</sup>H-NMR spectrum of 4-(5)-decyl-1H-imidazole (18)

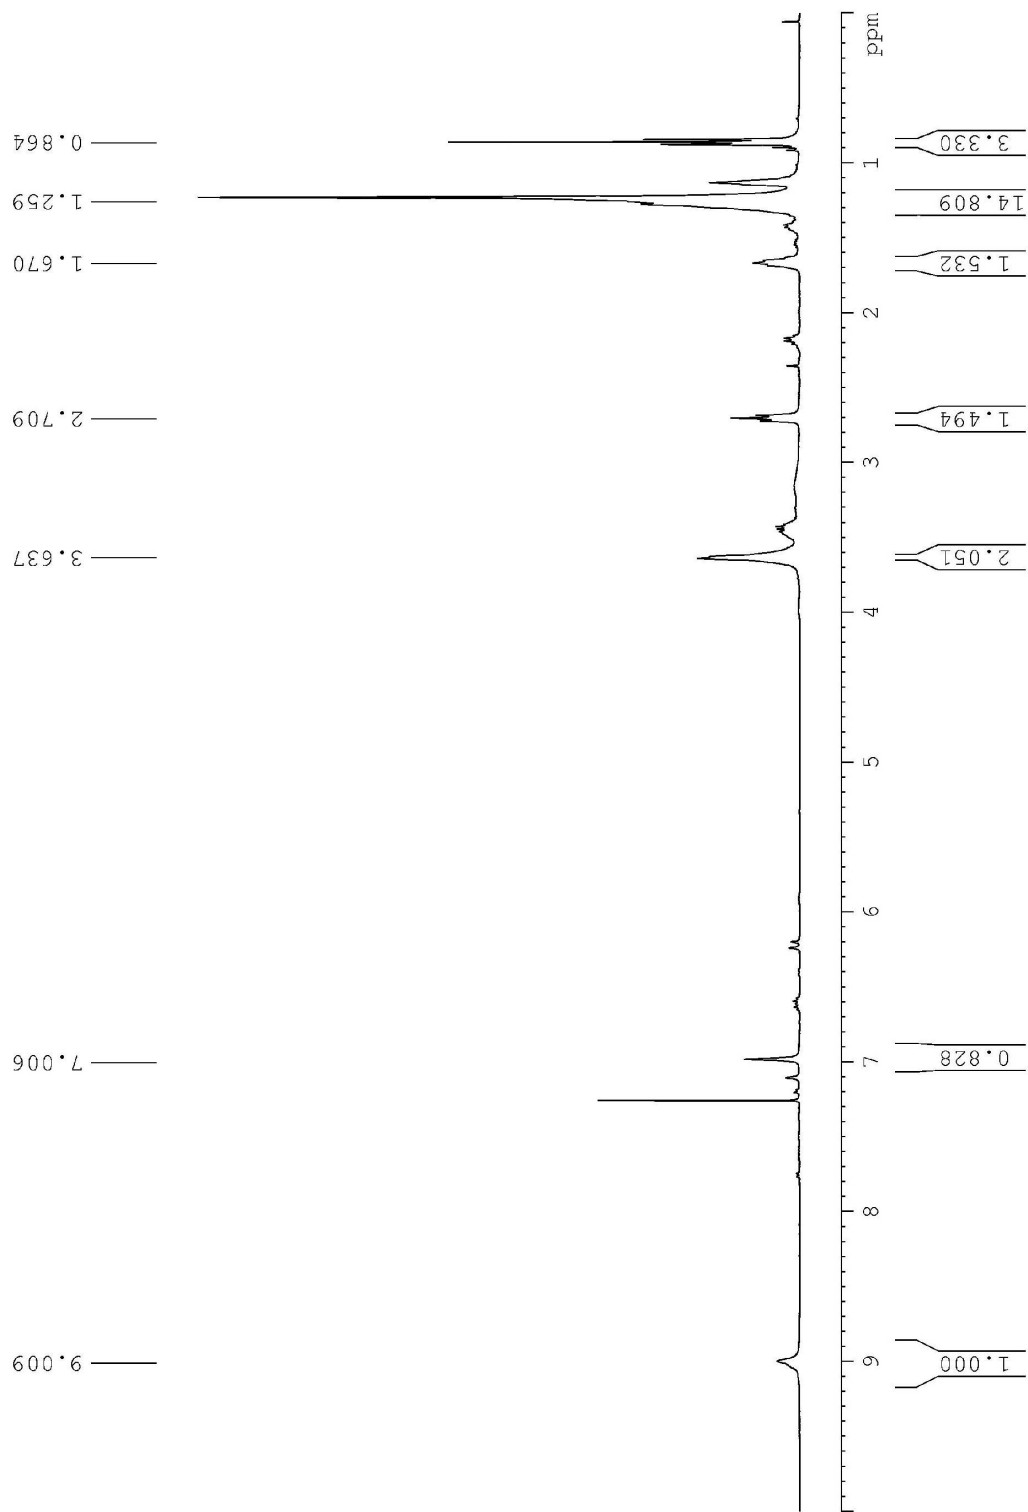



**<sup>13</sup>C-NMR spectrum of 4-(5)-decyl-1H-imidazole (18)**

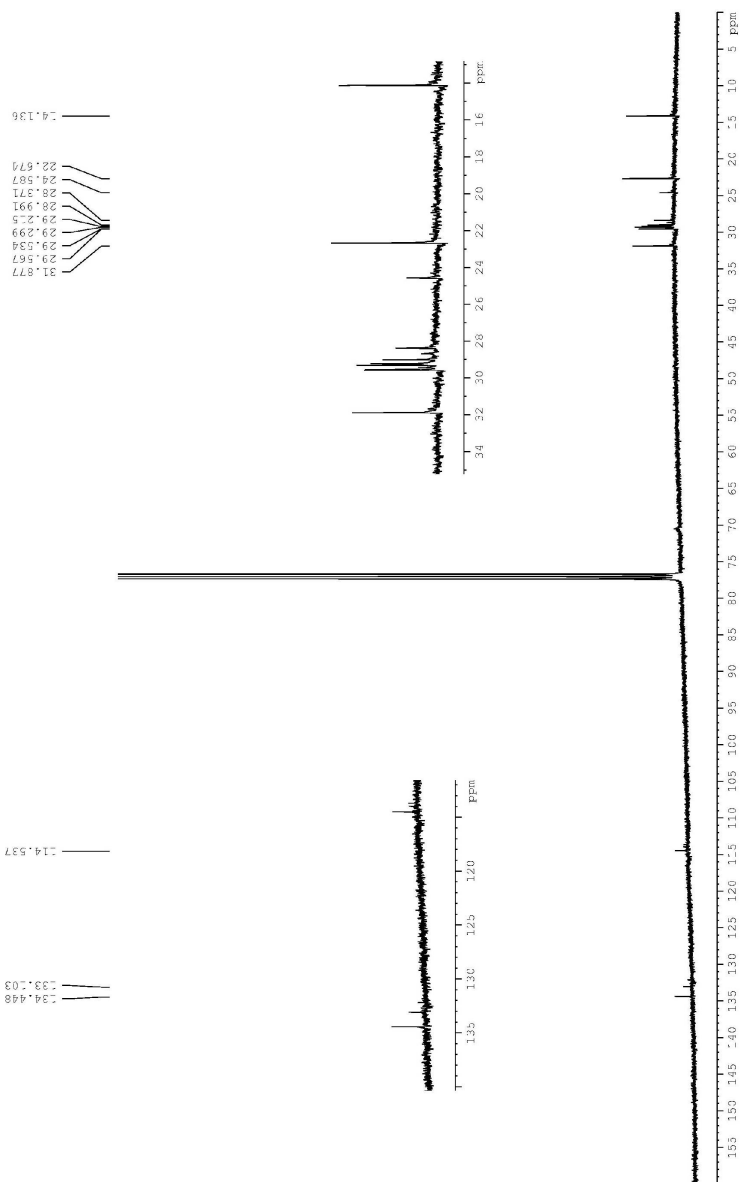

# HRMS spectrum of 4-(5)-decyl-1H-imidazole (18)

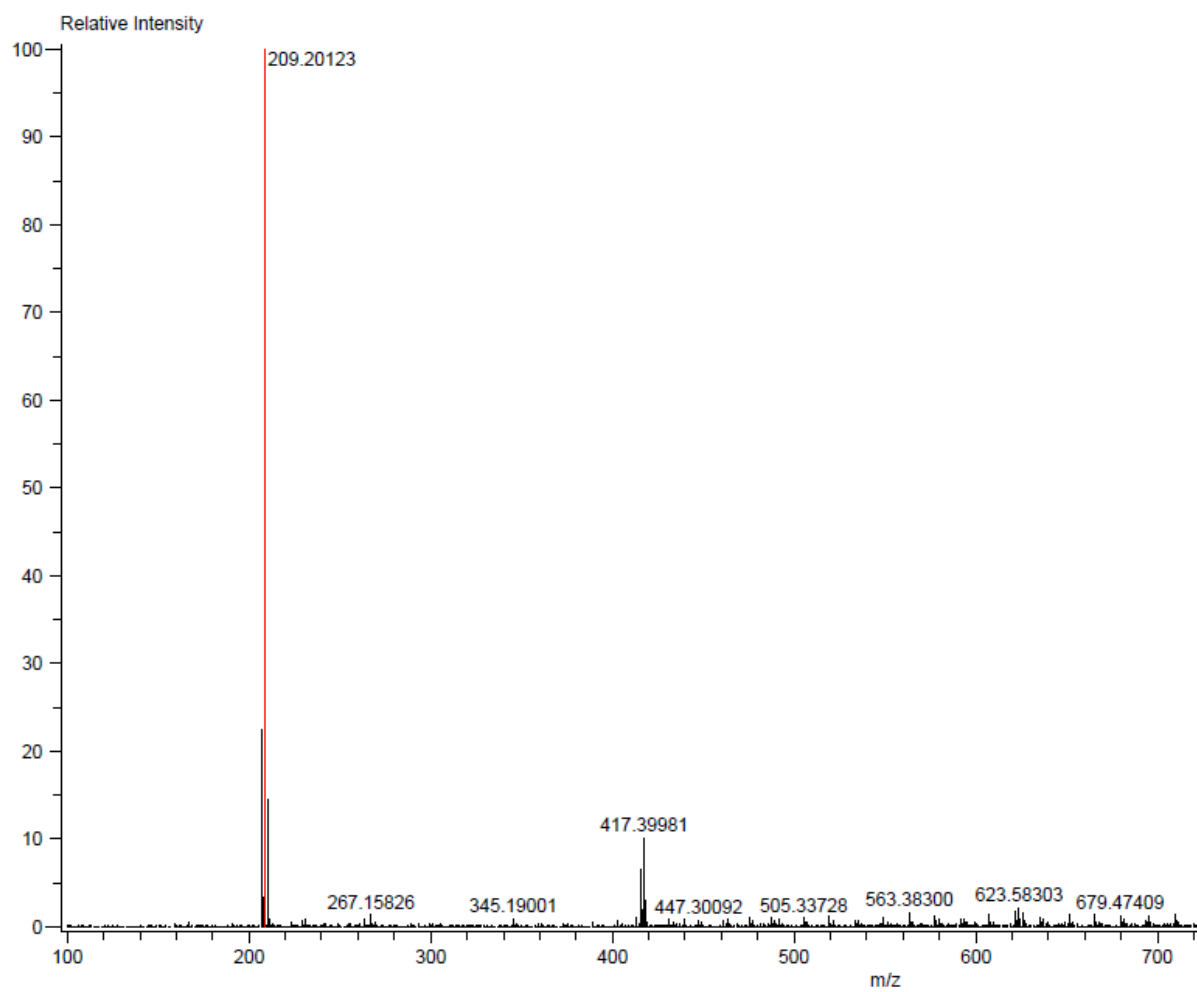

Supplement: cmdc0010-1522-sd1.pdf [file cmdc0010-1522-sd1.pdf]
